# Supplementary material for: Impact of a 3-Months Vegetarian Diet on the Gut Microbiota and Immune Repertoire
Source: Front Immunol. 2018 Apr 27;9:908. doi: 10.3389/fimmu.2018.00908 (PMC5934425; doi:10.3389/fimmu.2018.00908)
Supplement: Supplementary file 6 [file table_1.xlsx]

## Sheet: Table S1
Table S1: Information on study participants and samplesa
	Study group	Sampling time	Diet	Gender	BMI	Age	Metageome	Enterotype	Immune repertorie
5018	A	0d	Omnivorous	F	21.5	32	yes	1	yes
5019	A	0d	Omnivorous	M	27.5	35	yes	1	yes
5020	A	0d	Omnivorous	M	21.4	34	yes	2	yes
5043	A	0d	Omnivorous	F	23.4	59	yes	1	yes
5032	A	0d	Omnivorous	M	23.8	31	yes	3	yes
5033	A	0d	Omnivorous	F	21.2	34	yes	2	yes
5035	A	0d	Omnivorous	M	28.7	49	yes	1	yes
5034	A	0d	Omnivorous	F	23.6	46	yes	1	yes
S1-1	A	0d	Omnivorous	F	26.8	27	yes	3	no
S2-1	A	0d	Omnivorous	F	19.8	30	yes	1	no
S3-1	A	0d	Omnivorous	F	22.5	25	yes	1	no
S4-1	A	0d	Omnivorous	M	19.7	28	yes	1	no
S5-1	A	0d	Omnivorous	M	25.9	33	yes	1	no
S6-1	A	0d	Omnivorous	M	25.4	31	yes	3	no
S8-1	A	0d	Omnivorous	F	26.5	37	yes	1	no
5161	B	91d	Vegetarian	F	21.1	32	yes	1	yes
5160	B	91d	Vegetarian	M	25.3	35	yes	3	yes
5042	B	91d	Vegetarian	M	21.7	34	yes	2	yes
5163	B	91d	Vegetarian	F	22.7	59	yes	1	yes
5040	B	91d	Vegetarian	M	23	31	yes	3	yes
5039	B	91d	Vegetarian	F	21.2	34	yes	2	yes
5038	B	91d	Vegetarian	M	28.1	49	yes	1	yes
5037	B	91d	Vegetarian	F	23.8	46	yes	1	yes
S1-2	B	91d	Vegetarian	F	26.9	27	yes	3	no
S2-2	B	91d	Vegetarian	F	19.2	30	yes	2	no
S3-2	B	91d	Vegetarian	F	20.8	25	yes	1	no
S4-2	B	91d	Vegetarian	M	19.4	28	yes	2	no
S5-2	B	91d	Vegetarian	M	24.8	33	yes	1	no
S6-2	B	91d	Vegetarian	M	24.7	31	yes	3	no
S8-2	B	91d	Vegetarian	F	26.1	37	yes	1	no
5021	C	0d	Omnivorous	M	26.1	32	yes	1	yes
5022	C	0d	Omnivorous	F	19.7	27	yes	2	yes
5023	C	0d	Omnivorous	M	20.3	37	yes	3	yes
5162	C	0d	Omnivorous	M	24.7	33	yes	1	yes
5024	C	0d	Omnivorous	F	21.1	29	yes	1	yes
5025	C	0d	Omnivorous	M	22.6	34	yes	2	yes
5026	C	0d	Omnivorous	M	17.6	58	yes	2	yes
5159	D	91d	Omnivorous	M	26.6	32	yes	1	yes
5158	D	91d	Omnivorous	F	19.7	27	yes	2	yes
5157	D	91d	Omnivorous	M	20.1	37	yes	3	yes
5036	D	91d	Omnivorous	M	24.3	33	yes	1	yes
5168	D	91d	Omnivorous	F	22	29	yes	1	yes
5167	D	91d	Omnivorous	M	22.6	34	yes	2	yes
5029	D	91d	Omnivorous	M	17.6	58	yes	2	yes
5027	E	0d	Vegetarian	F	21.3	43	yes	1	yes
5028	E	0d	Vegetarian	M	22.2	34	yes	1	yes
5030	E	0d	Vegetarian	M	24.7	36	yes	1	yes
5031	E	0d	Vegetarian	F	16.3	25	yes	3	yes
V1-1	E	0d	Vegetarian	F	27.9	35	yes	3	no
V2-1	E	0d	Vegetarian	F	24.2	35	yes	1	no
V3-1	E	0d	Vegetarian	M	24.2	28	yes	3	no
5166	F	91d	Vegetarian	F	21.5	43	yes	1	yes
5165	F	91d	Vegetarian	M	21.5	34	yes	2	yes
5164	F	91d	Vegetarian	M	24.5	36	yes	1	yes
5041	F	91d	Vegetarian	F	16.5	25	yes	1	yes
V1-2	F	91d	Vegetarian	F	27.6	35	yes	3	no
V2-2	F	91d	Vegetarian	F	24.5	35	yes	1	no
V3-2	F	91d	Vegetarian	M	25.4	28	yes	3	no

## Sheet: Table S2
Table S2: Information on metagenome sequencing performance in each group
	Mean
Parameter	A (n=15)	B (n=15)	C (n=7)	D (n=7)	E (n=7)	F (n=7)
Raw reads	55389732	5.92127e+07	5.9966e+07	6.10432e+07	5.45543e+07	5.66444e+07
High quality reads	5.48129e+07	5.84123e+07	5.91303e+07	5.97461e+07	5.40458e+07	5.57301e+07
Mapping rate	0.78864	0.79554	0.796186	0.798543	0.783214	0.794229

## Sheet: Table S3
Table S3: Comparison of beta diversity among different groups
		p-value
	A vs B	C vs D	E vs F
Gene level	0.0908153	0.257248	1
Genus level	0.0107398	0.759288	0.0263309
Species level	0.0018277	0.657827	0.0546932
KO level	0.056121	0.0646496	0.00285721

## Sheet: Table S4
Table S4: Abundance and statistics at the genus level
	Study group			Control group I (omnivorous)			Conrol group II (vegetarian)
Genus	p-value (A vs. B)	Average abundance of A	Average abundance of B	p-value (C vs. D)	Average abundance of C	Average abundance of D	p-value (E vs. F)	Average abundance of E	Average abundance of F
Signficantly changed between A and B subgroups
Alistipes	0.00115967	0.0446604	0.0274074	0.15625	0.0388925	0.0531819	0.15625	0.0243444	0.0297785
Moorella	0.00871926	2.7237e-07	5.1197e-07	0.855132	2.67135e-07	3.08744e-07	0.855132	3.0945e-07	3.65529e-07
Mobiluncus	0.0124512	3.20992e-05	2.27281e-05	0.6875	1.83394e-05	2.08027e-05	0.078125	2.57091e-05	1.6199e-05
Histophilus	0.0178172	6.37535e-07	2.31617e-07	0.0590582	1.24095e-06	2.2938e-06	1	1.08213e-06	1.21533e-06
Leeuwenhoekiella	0.0224943	7.09558e-07	3.9337e-07	1	1.35211e-07	0	1	6.04846e-07	4.75846e-07
Proteus	0.0323129	2.80392e-05	6.28455e-08	0.9375	2.65135e-07	1.31466e-07	0.46875	2.17087e-07	5.39269e-08
Leptospira	0.0346106	1.29449e-06	7.31196e-07	0.583882	6.27372e-07	3.28166e-07	1	1.42677e-06	8.82446e-07
Natranaerobius	0.0559297	1.26808e-06	8.10412e-07	0.789268	3.69024e-07	2.64465e-07	0.181449	2.06126e-07	9.36311e-07
Lawsonia	0.0637207	1.22296e-05	1.22607e-05	0.296875	5.29945e-06	1.33395e-05	0.9375	6.22058e-06	6.0715e-06
Klebsiella	0.0637207	3.08693e-05	5.60317e-06	0.9375	0.000161014	3.74159e-05	0.578125	0.000544024	5.67678e-05
Dehalococcoides	0.0829604	3.25937e-07	3.32776e-07	0.280713	3.73036e-08	1.09871e-07	1	7.73042e-07	4.31248e-07
Macrococcus	0.0831311	1.02406e-06	4.87555e-07	0.181449	2.24996e-07	9.33749e-07	0.371093	7.98371e-07	1.03276e-06
Pseudoflavonifractor	0.083252	0.00103958	0.000915358	0.9375	0.00107156	0.000950657	0.8125	0.000724113	0.000640176
Peptostreptococcus	0.083252	5.42157e-06	9.91149e-06	0.578125	1.11654e-05	3.21756e-05	0.578125	8.50208e-06	5.56774e-06
Eubacterium	0.083252	0.016083	0.0232658	0.6875	0.0104102	0.00944674	0.03125	0.0145765	0.0082876
Scardovia	0.0934925	5.5792e-07	1.10058e-06	0.589639	3.5364e-06	8.36253e-07	0.105645	3.58252e-06	1.01539e-06
Oscillibacter	0.0946045	0.000266779	0.000247172	0.578125	0.000217716	0.00023628	0.9375	0.000146641	0.000172157
Taylorella	0.100348	2.0222e-07	7.21146e-07	1	2.20327e-07	6.09097e-07	NA	0	0
Riemerella	0.105645	3.73785e-07	8.40481e-07	1	2.3709e-08	2.52104e-08	1	4.82786e-09	0
Stenotrophomonas	0.105645	4.45935e-07	2.68064e-07	0.371093	1.32207e-07	4.48703e-07	1	0	3.15951e-08
Filifactor	0.107973	6.1186e-07	1.60593e-06	0.578125	5.83437e-06	2.5849e-06	0.0934925	7.53246e-07	1.85647e-07
Rhodopseudomonas	0.108319	1.91147e-08	5.79428e-08	0.371093	1.12755e-07	2.08024e-08	1	1.00555e-08	1.90346e-08
Shuttleworthia	0.120544	2.34078e-06	1.84177e-06	0.375	1.23944e-06	2.23959e-06	0.375	5.56764e-06	5.42419e-06
Slackia	0.120544	3.24196e-05	2.72084e-05	0.8125	1.92924e-05	1.88134e-05	0.8125	1.65218e-05	1.63553e-05
Megasphaera	0.135376	0.000316913	0.000198686	0.9375	0.00171413	0.00272337	0.578125	0.0190473	0.0159729
Cryptobacterium	0.142213	2.90847e-06	2.06099e-06	0.833935	1.17692e-06	1.01776e-06	0.294507	3.69253e-06	2.6052e-06
Thermoanaerobacter	0.146708	1.30304e-06	7.61886e-07	0.787406	7.76192e-07	2.36312e-06	0.855132	7.97537e-07	1.27639e-06
Mitsuokella	0.151428	5.0491e-05	0.000257801	0.8125	0.00112763	0.00175011	0.578125	0.00434991	0.0163348
Acidaminococcus	0.151428	0.000315805	0.000359827	0.9375	5.49153e-05	0.000111471	0.9375	0.000166678	0.000218785
Coprococcus	0.168823	0.00540014	0.00763626	0.6875	0.00243843	0.00297354	0.9375	0.00359976	0.00362893
Victivallis	0.168823	0.000791753	0.000296755	1	2.86468e-05	5.06709e-05	0.833935	2.06728e-05	1.39928e-05
Chitinophaga	0.181449	1.94857e-07	6.39906e-08	NA	0	0	1	1.62939e-07	1.11978e-07
Thermosinus	0.181449	5.62965e-07	7.70565e-07	0.422678	1.04428e-06	3.12839e-06	0.181449	3.19409e-08	1.19889e-07
Cyanothece	0.181449	0	6.18443e-08	1	0	3.98051e-08	1	5.7359e-08	5.15689e-08
Dickeya	0.181449	1.0304e-07	0	0.181449	0	2.85118e-07	1	1.98804e-07	4.39756e-08
Rahnella	0.181449	0	1.89929e-08	0.422678	1.01353e-07	8.67756e-09	1	3.82343e-07	1.20205e-07
Caulobacter	0.184235	4.11342e-06	3.69468e-06	0.529368	1.97673e-06	3.02141e-06	0.280713	3.20533e-06	1.45344e-06
Bacteroides	0.187622	0.205072	0.226794	0.6875	0.280555	0.311744	0.21875	0.165438	0.225281
Pseudoramibacter	0.187622	1.55026e-06	1.04087e-06	1	1.05781e-06	1.30817e-06	0.674987	3.34462e-07	4.17386e-07
Ruminococcus	0.187622	0.0125587	0.0141409	0.8125	0.0117378	0.0107997	0.03125	0.0144834	0.00825536
Anaerococcus	0.187622	1.33182e-06	2.56216e-06	0.8125	3.83534e-06	1.73549e-06	0.046875	2.16761e-06	1.00252e-06
Streptobacillus	0.201243	1.86743e-07	7.90187e-07	0.418492	3.73902e-07	7.40153e-07	NA	0	0
Desulfosporosinus	0.201243	3.99591e-07	1.15149e-07	1	2.91633e-08	0	1	3.68243e-08	3.55957e-07
Pantoea	0.201243	3.21358e-08	3.94791e-09	0.422678	1.00355e-07	5.77606e-08	0.855132	9.75131e-08	2.35649e-08
Pseudomonas	0.204894	3.38722e-07	9.78655e-08	1	4.6691e-06	7.08399e-07	0.583882	5.43142e-08	6.10156e-07
Parabacteroides	0.207764	0.0085279	0.00795406	0.8125	0.00753827	0.00820349	1	0.00658212	0.00892991
Treponema	0.207764	5.07257e-06	4.12242e-06	0.8125	3.85866e-06	4.24188e-06	0.21875	6.13224e-06	5.33467e-06
Paracoccus	0.208413	2.02731e-08	9.32535e-08	0.371093	8.79141e-08	4.09251e-07	1	3.84547e-08	2.17736e-08
Brachyspira	0.229309	3.74878e-06	2.72865e-06	1	8.45013e-07	9.59591e-07	0.583882	8.97042e-06	6.2106e-06
Methanobrevibacter	0.232966	0.00056151	0.000653234	0.03125	6.99902e-05	7.58579e-05	0.583882	0.000250638	0.00176925
Actinobacillus	0.233953	4.2982e-07	4.67863e-08	1	4.26854e-08	4.82657e-08	0.294507	8.54761e-07	2.68045e-07
Bulleidia	0.234811	1.15271e-06	2.6447e-06	0.208413	1.07511e-06	1.9212e-06	0.280713	5.93827e-08	2.38961e-08
Roseburia	0.25238	0.011275	0.0146172	0.8125	0.00522158	0.00589544	0.375	0.0122979	0.00848479
Solobacterium	0.25238	7.4426e-06	1.02098e-05	1	1.29387e-05	3.29994e-05	0.296875	8.35112e-06	5.03741e-06
Providencia	0.262193	2.28502e-06	1.33022e-07	0.296875	1.59002e-07	2.33002e-07	1	3.27977e-07	1.7502e-07
Phascolarctobacterium	0.276855	0.000899104	0.000938998	0.6875	8.9054e-05	0.000213251	0.9375	2.22666e-05	2.471e-05
Bilophila	0.276855	0.00295798	0.00179037	0.9375	0.0053275	0.00503481	0.674987	0.00140908	0.00120976
Atopobium	0.276855	1.72379e-05	1.86206e-05	1	9.91491e-06	1.03321e-05	0.6875	3.04289e-05	2.88121e-05
Enterococcus	0.276855	0.000147921	0.000132902	1	0.000354424	0.000355585	0.578125	0.000171731	0.000194992
Granulicatella	0.276855	2.21882e-06	2.98202e-06	0.296875	3.29512e-06	2.17114e-06	1	4.13722e-06	4.34758e-06
Gemella	0.276855	9.28639e-06	6.71783e-06	0.296875	2.68903e-05	7.16089e-06	0.109375	9.7715e-06	7.23707e-06
Acinetobacter	0.280713	1.54491e-08	3.97137e-09	0.833935	4.10273e-07	6.9667e-07	0.855132	2.33875e-07	1.49923e-07
Candidatus_Phytoplasma	0.293622	1.95887e-06	8.96027e-07	0.789268	7.61484e-08	3.62858e-07	0.371093	2.29549e-06	1.73387e-06
Desulfotomaculum	0.293622	5.15149e-07	2.97648e-07	1	2.11459e-07	3.85239e-07	0.36131	9.02386e-08	2.08577e-07
Yersinia	0.294507	2.57325e-06	4.76524e-07	0.422678	5.92262e-07	2.34906e-07	0.422678	2.32835e-07	8.61494e-08
Lactobacillus	0.302795	0.00020937	0.000395362	0.46875	0.00197518	0.000235421	0.046875	0.0382841	0.0326053
Selenomonas	0.302795	3.60208e-06	1.21035e-06	0.109375	2.35274e-06	4.52215e-06	0.46875	1.74296e-06	2.83981e-06
Epulopiscium	0.327877	8.12237e-07	7.16862e-07	0.787406	5.49006e-07	7.91133e-07	0.787406	7.90301e-07	7.04005e-07
Dialister	0.330261	0.00377013	0.00428099	0.6875	0.00162359	0.0016821	0.109375	0.000209676	0.000150299
Alkaliphilus	0.330261	3.0304e-06	3.32284e-06	0.46875	1.98865e-06	1.2791e-06	0.401678	2.50334e-06	2.96994e-06
Actinoplanes	0.352542	2.47641e-07	3.29432e-07	NA	0	0	0.789268	3.55432e-08	1.30322e-07
Butyrivibrio	0.359131	0.000735288	0.000364113	0.578125	0.00257915	0.0029925	0.21875	0.000244534	0.000206199
Dichelobacter	0.36131	1.94543e-07	1.06909e-07	1	9.06421e-08	1.89233e-07	1	1.52423e-08	0
Acidovorax	0.36131	3.05027e-07	3.90844e-07	1	1.58068e-07	1.6558e-07	0.583882	9.3084e-07	1.01293e-06
Erwinia	0.36131	2.48391e-06	2.717e-08	1	1.19203e-08	0	0.371093	3.46072e-07	0
Methanosphaera	0.362727	5.18121e-06	7.16347e-06	0.422678	7.11379e-08	2.76824e-05	NA	0	0
Helicobacter	0.363607	1.10594e-06	1.00174e-06	0.9375	1.17229e-06	6.48438e-07	1	1.70537e-07	1.8468e-07
Syntrophobacter	0.371093	3.5341e-07	4.17214e-07	1	1.17311e-06	8.11173e-07	NA	0	0
Chlorobium	0.371093	3.78794e-08	4.92183e-08	1	0	1.07106e-08	0.789268	1.04722e-07	1.27899e-07
Sporosarcina	0.371093	8.77033e-09	2.42327e-08	NA	0	0	0.371093	0	6.67627e-08
Sodalis	0.371093	1.85322e-08	3.29346e-09	0.371093	3.95854e-08	0	NA	0	0
Brucella	0.371093	2.58048e-08	1.37888e-08	1	3.54289e-09	2.20061e-08	NA	0	0
Candidatus_Arthromitus	0.371093	7.05689e-08	3.92562e-08	1	1.59086e-07	5.66329e-07	NA	0	0
Cylindrospermopsis	0.371093	0	6.09324e-08	1	1.5928e-06	1.10088e-07	NA	0	0
Bordetella	0.371093	6.14713e-08	3.10715e-08	0.371093	6.30973e-07	9.64593e-07	1	1.11409e-07	2.7972e-08
Photorhabdus	0.371093	8.1994e-08	0	NA	0	0	1	0	1.38127e-08
Caldalkalibacillus	0.371093	7.29367e-08	5.10077e-07	1	9.63963e-08	1.68067e-07	1	5.56456e-07	2.13934e-07
Parvibaculum	0.371093	2.85405e-08	0	1	2.60934e-08	2.52079e-08	1	2.73681e-08	9.97743e-08
Pectobacterium	0.371093	0	1.15342e-08	1	3.41209e-07	0	1	1.27738e-08	0
Lactococcus	0.389404	5.04016e-05	3.05844e-05	0.578125	5.82808e-05	4.78113e-05	0.15625	5.15302e-05	1.07761e-05
Rhodospirillum	0.401678	1.61823e-06	3.00368e-06	0.589639	4.10493e-07	1.48251e-06	0.371093	1.79807e-06	7.05311e-07
Serratia	0.418492	9.699e-08	2.62305e-08	0.100348	1.87342e-07	0	0.422678	6.58646e-07	1.35825e-08
Ureaplasma	0.418492	2.63441e-08	9.62735e-08	1	2.03683e-08	3.96613e-08	1	1.43422e-08	1.80683e-08
Streptomyces	0.422678	6.78003e-08	1.90964e-08	1	0	3.08693e-08	1	3.87947e-08	0
Oxalobacter	0.454285	7.30542e-05	8.54753e-05	0.9375	8.7858e-06	1.02385e-05	0.833935	5.20075e-06	3.65209e-06
Dorea	0.454285	0.00506486	0.00491828	0.375	0.00526905	0.00444035	0.46875	0.00279847	0.00166396
Paraprevotella	0.454285	0.000491989	0.000518116	0.578125	0.000463489	0.000332574	0.9375	0.000547001	0.000359388
Citrobacter	0.454285	3.30817e-05	4.40962e-06	0.46875	1.29043e-05	2.12392e-05	0.578125	1.27245e-05	6.75346e-05
Parascardovia	0.477197	1.10069e-06	1.26298e-06	0.418492	2.59131e-07	1.7773e-07	1	7.88534e-06	9.22991e-06
Blautia	0.488708	0.00725079	0.00760356	0.578125	0.00846775	0.00744924	0.8125	0.0063846	0.00519296
Cellulosilyticum	0.488708	6.63674e-06	5.92354e-06	0.8125	6.14109e-06	3.7387e-06	0.589639	3.92437e-06	2.85664e-06
Prevotella	0.488708	0.0255276	0.0301413	0.578125	0.044636	0.0143136	0.6875	0.0344329	0.0342189
Weissella	0.488708	2.70994e-07	3.18797e-06	0.296875	1.78796e-07	1.12796e-07	0.208413	1.93722e-06	3.8596e-07
Staphylococcus	0.489854	8.02829e-07	2.05495e-06	0.9375	1.9196e-06	1.69767e-06	1	2.49386e-05	1.70885e-05
Corynebacterium	0.504903	2.43139e-06	1.62384e-06	0.529368	7.75532e-06	3.41243e-06	0.6875	4.62667e-05	3.2312e-05
Veillonella	0.524475	0.000128961	5.79039e-05	0.8125	8.36085e-05	9.06098e-05	0.578125	0.000426491	0.0002026
Tannerella	0.524475	4.86553e-06	3.99457e-06	0.375	1.05381e-05	1.76942e-05	0.9375	5.58841e-06	5.78444e-06
Acetobacterium	0.528612	4.83025e-08	6.62305e-08	0.100348	7.77646e-08	7.07105e-07	NA	0	0
Succinatimonas	0.529368	9.91691e-07	1.34924e-06	0.583882	6.70642e-06	1.41269e-06	1	3.78674e-09	1.36392e-08
Shewanella	0.529368	1.64547e-07	6.4285e-09	0.855132	3.67854e-07	1.71951e-07	1	1.81686e-08	5.82296e-08
Vibrio	0.540818	5.15624e-06	4.11407e-06	1	9.65591e-07	2.32023e-06	0.529368	4.32261e-06	1.96627e-06
Coriobacterium	0.553617	2.58054e-07	1.86636e-07	0.583882	3.25472e-07	2.21269e-07	0.589639	1.31153e-07	7.27156e-08
Symbiobacterium	0.554113	4.06775e-08	2.29419e-08	1	8.65399e-08	1.73604e-08	NA	0	0
Campylobacter	0.561401	3.87148e-05	4.63948e-05	0.296875	5.92109e-05	4.34546e-05	0.8125	1.27047e-05	1.16602e-05
Porphyromonas	0.561401	2.47731e-05	3.34969e-05	0.9375	3.16464e-05	1.4383e-05	0.578125	1.97394e-05	2.77386e-05
Enterobacter	0.561401	0.000119621	7.85647e-06	1	6.87018e-05	9.69806e-05	0.8125	0.000437159	1.44474e-05
Rothia	0.561401	1.77714e-07	2.72503e-07	0.578125	1.54806e-07	1.92972e-07	0.208413	4.73997e-08	9.43696e-08
Oribacterium	0.561401	1.32028e-05	1.38226e-05	0.6875	1.37695e-05	2.05575e-05	0.15625	1.33056e-05	2.09575e-05
Actinomyces	0.561401	2.28372e-05	3.23891e-05	0.15625	3.84429e-05	1.89258e-05	1	3.19045e-05	5.24059e-05
Clostridium	0.561401	0.00774692	0.00852378	1	0.00881253	0.00873577	0.46875	0.010723	0.00843382
Edwardsiella	0.583882	2.18151e-08	5.80209e-09	0.100348	3.89294e-07	6.72913e-09	1	1.30146e-07	7.91403e-08
Lautropia	0.583882	4.54102e-07	5.46718e-07	0.789268	1.11032e-06	2.01803e-06	0.789268	1.72059e-06	4.61084e-06
Coxiella	0.589639	1.44311e-06	3.70817e-06	1	1.8768e-07	8.19301e-07	0.100348	5.03179e-07	1.21596e-07
Aeromonas	0.589639	1.98344e-08	7.02151e-09	0.371093	1.55291e-08	0	1	2.10428e-08	0
Eggerthella	0.599487	0.000685804	0.000662338	0.46875	0.00112384	0.000648478	0.375	0.000258735	0.000235028
Odoribacter	0.599487	0.00261637	0.00242848	0.21875	0.00259331	0.00365818	0.6875	0.00305702	0.0013827
Salmonella	0.599487	1.52735e-05	5.52837e-06	0.6875	1.42544e-05	5.93902e-06	0.9375	1.79614e-05	4.23474e-06
Holdemania	0.638672	0.000481903	0.000543537	0.46875	0.000728952	0.000597842	0.6875	0.000363393	0.000393706
Pelotomaculum	0.660346	2.13682e-06	2.25949e-06	0.589639	5.32002e-06	5.17001e-06	0.583882	2.3025e-06	3.49361e-06
Pyramidobacter	0.666137	7.1501e-07	1.62575e-06	1	9.97964e-07	1.35672e-06	1	2.59978e-06	2.85427e-06
Acholeplasma	0.672604	3.11371e-06	3.97094e-06	1	1.11161e-06	3.0101e-06	NA	0	0
Mycoplasma	0.672604	8.82445e-07	6.19168e-07	0.36131	4.22811e-07	1.64884e-07	0.789268	1.01619e-06	6.91389e-07
Bifidobacterium	0.678772	0.0231105	0.0207804	0.46875	0.0262032	0.0232399	0.03125	0.0876728	0.0540493
Parasutterella	0.678772	0.00293753	0.00293333	0.9375	0.000740926	0.000843763	0.401678	0.000248975	0.000238727
Escherichia	0.678772	0.0127188	0.00193563	0.578125	0.00304958	0.00322889	0.296875	0.000380961	0.00153848
Finegoldia	0.678772	9.77735e-07	9.42621e-07	0.9375	1.36266e-06	1.49603e-06	0.21875	8.2704e-07	5.53165e-07
Acetivibrio	0.706427	3.32958e-06	3.4348e-06	1	1.41939e-06	2.67821e-06	0.418492	2.9849e-06	2.76638e-06
Fusobacterium	0.719727	3.40024e-06	1.18308e-06	0.578125	1.81403e-05	0.000275699	0.078125	8.94602e-06	4.08005e-06
Streptococcus	0.719727	0.000908867	0.00113577	0.15625	0.000965783	0.000624804	0.46875	0.00142499	0.000454412
Faecalibacterium	0.719727	0.0510101	0.0497787	1	0.0475426	0.042689	0.03125	0.0618234	0.0370572
Dysgonomonas	0.722283	9.56415e-07	1.07651e-06	1	2.43756e-07	3.27283e-07	0.583882	1.111e-07	1.91874e-07
Synechococcus	0.726286	1.57366e-07	8.57451e-08	0.371093	1.14241e-05	8.0374e-07	0.100348	3.40342e-07	6.46266e-08
Desulfitobacterium	0.75361	1.07798e-06	1.87183e-06	0.674987	3.83158e-07	3.65935e-07	1	1.44607e-07	2.37483e-07
Paenibacillus	0.75361	3.2427e-06	3.06055e-06	0.46875	5.58421e-07	9.47436e-07	0.578125	1.34796e-06	1.85411e-06
Anaerostipes	0.761536	4.83868e-05	5.61706e-05	0.375	6.40508e-05	2.64196e-05	0.46875	3.6351e-05	1.80067e-05
Thermaerobacter	0.787406	3.86884e-08	2.50428e-08	1	1.03463e-07	4.7041e-08	1	3.1589e-08	0
Desulfobulbus	0.787406	6.78699e-08	6.8053e-08	1	1.28218e-08	1.858e-08	0.789268	4.70963e-08	2.47511e-08
Acetobacter	0.787406	4.2788e-06	3.31597e-06	1	6.96699e-07	7.88599e-06	0.371093	7.14615e-06	3.81344e-06
Micrococcus	0.789268	1.95349e-08	7.63804e-09	NA	0	0	1	2.75811e-08	1.33445e-08
Thermincola	0.789268	1.36104e-07	1.3325e-07	0.422678	1.2325e-07	2.95628e-07	1	7.97301e-07	8.00051e-07
Centipeda	0.789268	1.12791e-07	6.62817e-07	1	6.43168e-08	8.1551e-08	1	2.80966e-08	8.41884e-08
Haemophilus	0.803955	0.000624724	0.000152638	0.296875	0.000101224	4.32825e-05	0.9375	0.000417844	0.000625517
Anaerotruncus	0.803955	0.000627879	0.000588331	0.6875	0.000772503	0.000607153	0.21875	0.000440893	0.000375591
Bacillus	0.803955	8.11699e-06	9.41985e-06	0.6875	5.55118e-06	5.14557e-06	0.9375	7.52703e-06	7.60961e-06
Burkholderia	0.803955	3.38694e-06	3.13362e-06	0.9375	3.66877e-06	4.40206e-06	0.8125	7.04421e-06	8.99491e-06
Oceanithermus	0.812704	3.66917e-07	3.57932e-07	1	8.8996e-08	1.44652e-07	1	2.47862e-07	2.51887e-07
Heliobacterium	0.824098	1.9085e-06	2.05983e-06	0.583882	1.34879e-07	2.20585e-07	0.371093	2.92453e-07	8.97369e-07
Brevibacillus	0.833935	2.12247e-07	1.49715e-07	1	2.41616e-07	2.67241e-07	1	4.17341e-08	7.33487e-08
Coprobacillus	0.846924	0.000279243	0.000257453	0.9375	0.000299555	0.000306614	0.015625	0.000622527	0.000148452
Turicibacter	0.846924	1.57217e-05	2.93399e-05	0.578125	4.30763e-06	4.39074e-06	0.578125	5.8588e-06	1.71964e-05
Ethanoligenens	0.846924	6.40271e-06	6.35696e-06	0.6875	6.43339e-06	5.54792e-06	1	6.385e-06	5.21653e-06
Eremococcus	0.850618	4.24608e-07	3.92634e-07	0.8125	3.72689e-07	3.82223e-07	0.833935	5.3484e-07	4.15742e-07
Azospira	0.855132	2.57544e-07	2.1122e-07	0.422678	2.47284e-07	1.11118e-07	1	0	5.5944e-08
Catenulispora	0.855132	3.15009e-08	3.80545e-08	1	0	1.6886e-08	NA	0	0
Caldicellulosiruptor	0.855132	2.16019e-07	2.26105e-07	1	0	7.75691e-08	1	6.95569e-08	9.79231e-08
Gordonia	0.855132	5.96876e-08	6.59391e-08	0.789268	1.22812e-07	8.67719e-08	1	1.86227e-07	2.00986e-07
Geobacillus	0.855132	3.00216e-08	2.53178e-08	1	1.36625e-07	1.00046e-06	0.371093	7.22316e-08	0
Mannheimia	0.855132	5.04081e-08	2.50862e-08	NA	0	0	NA	0	0
Desulfovibrio	0.890381	0.000946172	0.00126211	0.109375	0.000713011	0.000844092	0.46875	0.000119424	0.000303976
Sutterella	0.890381	0.00151086	0.00131587	0.6875	0.00334932	0.00486162	0.8125	0.0101908	0.0165785
Subdoligranulum	0.890381	0.00114579	0.00126424	0.578125	0.00116561	0.00120578	0.21875	0.00129108	0.00106107
Thermoanaerobacterium	0.890381	3.22043e-06	3.61606e-06	0.9375	3.45861e-06	3.82948e-06	0.833935	3.20843e-06	3.31282e-06
Collinsella	0.934082	0.00522749	0.00570966	0.46875	0.00367425	0.00335563	0.6875	0.00660138	0.00545336
Oenococcus	0.934082	2.59663e-05	1.33125e-05	0.03125	2.69398e-07	1.40609e-06	0.21875	3.72417e-05	6.54496e-06
Abiotrophia	0.934082	9.8403e-06	1.12048e-05	0.6875	5.39463e-06	7.65257e-06	0.6875	2.75222e-05	2.46084e-05
Anaeromyxobacter	0.944183	1.16342e-07	1.42334e-07	1	1.31111e-07	1.32826e-07	0.181449	6.23641e-08	1.60883e-07
Listeria	0.944183	3.19038e-08	4.79774e-08	0.855132	9.05687e-08	8.11324e-08	0.201243	2.73541e-07	6.72938e-08
Olsenella	0.949944	3.24983e-05	3.48656e-05	0.46875	1.86481e-05	2.65641e-05	0.9375	2.44491e-05	1.85077e-05
Neisseria	0.977966	3.0093e-06	1.52641e-06	0.8125	1.57758e-06	4.98402e-07	1	3.48117e-06	3.51229e-06
Aggregatibacter	0.977966	5.2905e-06	1.97892e-06	0.8125	3.92168e-06	4.78928e-07	0.578125	4.57418e-06	6.07469e-06
Anaerofustis	0.977966	2.6215e-06	2.56899e-06	0.21875	2.39442e-06	1.33057e-06	0.142213	3.23809e-06	1.57526e-06
Capnocytophaga	1	0.00255491	0.00262428	0.578125	0.00219305	0.00186098	0.375	0.00280248	0.0014278
Ruegeria	1	4.98585e-09	5.67687e-09	0.181449	1.96352e-08	6.11374e-08	NA	0	0
Caldanaerobacter	1	9.68227e-08	2.31446e-08	0.371093	4.35969e-07	2.46756e-07	NA	0	0
Dehalogenimonas	1	8.06829e-08	6.79053e-08	0.371093	5.91224e-07	5.19409e-07	NA	0	0
Ralstonia	1	4.72033e-07	2.99943e-07	0.422678	1.17954e-06	4.24571e-08	NA	0	0
Leuconostoc	1	3.6779e-06	4.65912e-06	0.375	8.14945e-07	1.31011e-06	0.015625	1.08276e-05	1.79397e-07
Mesoplasma	1	2.29615e-07	4.72781e-07	NA	0	0	1	1.64329e-06	1.57313e-06
Variovorax	1	6.23479e-08	5.17927e-08	1	2.08693e-07	1.46345e-07	1	0	2.22154e-08
Arthrobacter	1	1.52402e-08	1.11743e-08	NA	0	0	0.371093	0	6.92477e-08
Haloplasma	1	4.95563e-08	0	NA	0	0	1	4.5212e-07	3.0562e-07
Nitrosococcus	1	4.1e-07	1.3991e-07	NA	0	0	1	2.22575e-06	7.78674e-07
Desulfarculus	1	2.44088e-07	2.04523e-07	1	1.4081e-06	1.48161e-06	NA	0	0
Marinomonas	1	1.26516e-08	2.44917e-08	1	1.38151e-07	2.67357e-08	NA	0	0
Pasteurella	1	1.20596e-08	6.37921e-08	1	6.03433e-08	3.68267e-08	NA	0	0
Erysipelothrix	1	5.65057e-07	6.83475e-07	0.789268	1.70918e-06	6.60859e-07	1	1.83645e-07	3.12787e-07
Azospirillum	1	1.57569e-08	0	1	2.41997e-08	0	1	6.81427e-08	5.68713e-08
Aminomonas	1	4.633e-08	1.12863e-08	0.371093	1.91542e-07	3.78681e-07	1	0	2.539e-08
Buchnera	1	0	1.14113e-08	NA	0	0	1	0	4.02524e-08
Delftia	1	1.26272e-09	0	NA	0	0	1	5.41066e-08	0
Jonquetella	1	0	1.70546e-08	NA	0	0	1	0	5.14806e-08
Planococcus	1	0	8.3252e-08	NA	0	0	1	0	9.70793e-08
Sphingobium	1	0	1.8035e-08	NA	0	0	1	4.63644e-08	0
Thioalkalivibrio	1	0	2.70494e-09	NA	0	0	1	2.61863e-07	0
Xenorhabdus	1	6.15672e-09	4.17251e-09	NA	0	0	1	4.73057e-09	0
Asticcacaulis	1	3.22279e-08	9.70467e-09	1	7.82347e-08	0	NA	0	0
Desulfurispirillum	1	4.24769e-08	2.22791e-08	1	0	3.60143e-08	NA	0	0
Methylobacillus	1	1.72511e-09	0	1	9.60711e-08	0	NA	0	0
Syntrophomonas	1	6.86967e-09	2.30127e-08	1	0	2.15443e-08	NA	0	0
Peptoniphilus	1	7.90652e-06	1.08072e-05	1	1.3417e-05	8.72651e-06	0.078125	8.43768e-06	6.85823e-06
Ornithinibacillus	1	8.09199e-08	9.20685e-08	0.855132	5.26624e-07	5.04917e-07	1	1.61415e-07	2.55148e-07
Eikenella	1	2.13997e-09	1.95101e-09	1	2.28874e-08	1.9752e-08	1	0	1.07513e-08
Ilyobacter	1	1.97249e-08	2.41929e-08	1	8.89813e-08	4.80603e-08	1	0	4.23166e-08
Kingella	1	8.22921e-08	4.63354e-08	0.855132	3.25018e-08	4.06146e-08	0.418492	1.50736e-07	5.24929e-08
Catonella	1	6.946e-08	0	0.371093	1.44885e-08	0	1	8.61871e-09	2.01686e-08
Thauera	1	3.50074e-08	8.27407e-10	0.371093	1.35836e-08	0	1	4.68571e-08	7.67306e-09
Geobacter	1	4.22434e-08	8.21593e-08	0.371093	0	3.1731e-08	1	1.07316e-07	0
Achromobacter	1	4.30747e-09	7.8254e-09	1	4.41871e-07	3.84877e-09	1	5.64701e-08	5.48856e-08
Propionibacterium	1	1.5713e-07	7.03729e-08	1	1.94305e-06	9.60977e-07	0.371093	1.45205e-07	1.86223e-07
Akkermansia	1	0.00441167	0.00332188	0.578125	0.0235426	0.0151699	0.46875	0.0129027	0.0348254
Comamonas	1	1.05962e-08	1.12041e-08	1	5.8539e-08	3.13494e-08	0.371093	2.10165e-07	1.6687e-09
Fluviicola	1	1.29991e-06	1.50414e-06	1	6.40747e-06	2.77091e-06	0.371093	1.83206e-06	1.0764e-06
Mahella	1	0	3.66805e-08	1	1.30135e-07	7.18484e-07	1	7.79993e-08	3.55446e-08
Methylibium	1	3.71784e-07	2.38531e-07	1	1.00287e-06	4.621e-08	1	3.89997e-08	1.77723e-08
Gardnerella	1	5.70387e-08	4.07794e-08	1	2.96485e-07	4.57965e-08	1	5.88573e-08	1.53256e-07
Pelobacter	1	0	1.09899e-08	1	2.47963e-08	0	1	2.40774e-08	0
Carboxydothermus	1	4.01407e-07	2.33931e-07	NA	0	0	NA	0	0
Gallibacterium	1	6.7124e-09	0	NA	0	0	NA	0	0
Pediococcus	1	0	5.4187e-09	NA	0	0	NA	0	0
Rhodococcus	1	6.37272e-08	4.22534e-08	NA	0	0	NA	0	0
Sphingopyxis	1	0	2.83925e-09	NA	0	0	NA	0	0
Spirochaeta	1	7.11847e-08	7.86633e-08	NA	0	0	NA	0	0
Syntrophobotulus	1	1.86637e-08	0	NA	0	0	NA	0	0
Tepidanaerobacter	1	0	2.19423e-08	NA	0	0	NA	0	0
Thermanaerovibrio	1	1.22323e-08	0	NA	0	0	NA	0	0
Thermosediminibacter	1	1.5209e-08	0	NA	0	0	NA	0	0
Thiomicrospira	1	2.63357e-09	0	NA	0	0	NA	0	0
Thiomonas	1	1.64375e-09	0	NA	0	0	NA	0	0
Xanthomonas	1	0	2.14302e-08	NA	0	0	NA	0	0
Methyloversatilis	NA	0	0	NA	0	0	0.371093	1.98605e-08	1.09192e-08
Sinorhizobium	NA	0	0	NA	0	0	1	1.04335e-07	4.12587e-07
Chlamydia	NA	0	0	1	1.71214e-07	7.42599e-08	NA	0	0
Desulfuromonas	NA	0	0	1	7.95924e-07	6.92351e-07	NA	0	0
Elusimicrobium	NA	0	0	1	3.85862e-07	1.07857e-06	NA	0	0
Syntrophus	NA	0	0	1	2.18754e-07	3.77525e-07	NA	0	0
Cronobacter	NA	0	0	1	1.20495e-08	0	1	5.29266e-08	1.65102e-08
Candidatus_Hamiltonella	NA	0	0	NA	0	0	1	4.20274e-09	0
Conexibacter	NA	0	0	NA	0	0	1	1.02171e-07	0
Cupriavidus	NA	0	0	NA	0	0	1	3.48969e-09	0
Rhizobium	NA	0	0	NA	0	0	1	4.47151e-08	0
Cardiobacterium	NA	0	0	1	3.31806e-08	0	NA	0	0
Fibrobacter	NA	0	0	1	4.83527e-08	0	NA	0	0
Labrenzia	NA	0	0	1	4.13146e-08	0	NA	0	0
Leptotrichia	NA	0	0	1	3.85887e-08	0	NA	0	0
Xylella	NA	0	0	1	7.7117e-09	0	NA	0	0
Alicycliphilus	NA	0	0	1	2.13679e-08	0	1	1.60339e-08	0
Candidatus_Liberibacter	NA	0	0	1	0	2.15443e-08	1	0	1.63423e-08
Nitrosomonas	NA	0	0	1	0	4.54389e-08	1	0	6.2359e-09

## Sheet: Table S5
Table S5: Abundance and statisitics at the species level
	Study group			Control group I (omnivorous)			Conrol group II (vegetarian)
species	p-value(A vs. B)	Average abundance of A	Average abundance of B	p-value(C vs. D)	Average abundance of C	Average abundance of D	p-value(E vs. F)	Average abundance of E	Average abundance of F
Signficantly changed between A and B subgroups
unclassified Alistipes sp. HGB5	0.00262451	0.00714486	0.00599777	0.109375	0.00427061	0.00744654	0.21875	0.00133668	0.00150061
Ruminococcus lactaris	0.00335693	0.000578434	0.0011162	1	0.000433567	0.000334096	0.8125	0.000479555	0.000549533
Alistipes shahii	0.00836182	0.00480423	0.00299008	0.046875	0.00600602	0.0119496	0.578125	0.0100896	0.0101734
Alistipes putredinis	0.0124512	0.0186064	0.0100713	0.375	0.0234982	0.0275682	0.15625	0.0100715	0.0138787
Bacteroides uniformis	0.0150757	0.0336717	0.048141	0.578125	0.0795138	0.0838398	0.8125	0.0249716	0.0228863
Roseburia inulinivorans	0.0215454	0.00297695	0.00407913	0.9375	0.00150968	0.00201821	0.9375	0.00167867	0.00180897
Zunongwangia profunda	0.0224943	7.09558e-07	3.9337e-07	1	1.35211e-07	0	1	6.04846e-07	4.75846e-07
Bacteroides ovatus	0.0301514	0.0053615	0.00904482	0.375	0.0168652	0.0203461	0.46875	0.0168783	0.0220055
Proteus mirabilis	0.0323129	2.77507e-05	6.28455e-08	0.9375	2.37187e-07	1.22532e-07	0.6875	2.04624e-07	4.14571e-08
Lactobacillus plantarum	0.0423153	2.62928e-08	4.86537e-07	0.401678	1.23079e-06	1.29075e-07	0.589639	2.06026e-08	2.06297e-07
unclassified Prevotella sp. oral taxon 472	0.0454588	1.90259e-05	1.81464e-05	1	7.93608e-06	3.57535e-06	1	2.91783e-06	3.0512e-06
Streptococcus thermophilus	0.0479126	8.64685e-05	0.000462918	0.03125	0.00018935	4.91393e-05	0.9375	0.00028568	5.1256e-05
Enterobacter aerogenes	0.0516462	8.38438e-06	1.56559e-06	0.8125	1.45094e-06	1.58631e-05	0.6875	8.34271e-06	4.76315e-07
Eubacterium rectale	0.0553589	0.00954437	0.0154624	0.8125	0.00397704	0.00419187	0.046875	0.00702589	0.00376451
unclassified Ruminococcus sp. SR1/5	0.0553589	0.00313828	0.00391721	0.6875	0.00211511	0.0018389	0.8125	0.00162984	0.000951672
Bulleidia extructa	0.0590582	1.81637e-07	7.46708e-07	0.100348	2.86654e-07	6.55826e-07	0.181449	5.51785e-08	0
Enterococcus casseliflavus	0.0590582	6.00187e-08	1.14695e-09	1	1.31454e-08	0	0.371093	1.31025e-07	8.34947e-08
Porphyromonas endodontalis	0.0590582	6.94639e-07	1.41918e-06	1	4.11672e-08	3.63061e-08	0.371093	3.86156e-08	2.55162e-08
Lawsonia intracellularis	0.0637207	1.21006e-05	1.21628e-05	0.296875	5.29945e-06	1.33395e-05	0.9375	6.22058e-06	6.0715e-06
Lactobacillus salivarius	0.083252	6.96327e-07	2.033e-05	0.21875	3.42224e-07	8.09692e-08	0.296875	2.64634e-06	1.81005e-06
Atopobium parvulum	0.083252	1.94998e-06	3.51411e-06	0.46875	1.83785e-06	1.18878e-06	0.296875	2.68169e-06	4.5444e-06
Prevotella disiens	0.083252	3.61402e-05	4.1047e-05	0.46875	5.57704e-05	3.9453e-05	0.296875	4.04024e-05	4.51518e-05
Parvimonas micra	0.083252	1.33513e-06	1.58148e-06	0.9375	6.00106e-06	1.90978e-06	0.21875	1.74724e-06	8.15801e-07
Streptococcus mitis	0.083252	1.81446e-06	2.17114e-06	0.9375	8.32831e-06	2.20531e-06	0.6875	3.85119e-06	2.79812e-06
Acidaminococcus fermentans	0.0946045	0.000279155	0.000329434	0.6875	7.31413e-06	1.20194e-05	0.578125	1.70345e-05	1.61951e-05
Actinobacillus pleuropneumoniae	0.100348	3.68058e-08	0	1	0	1.53401e-08	0.422678	8.67092e-08	1.40064e-08
unclassified Veillonella sp. oral taxon 780	0.100348	0	6.36359e-09	1	2.97454e-09	1.55959e-08	0.371093	7.83867e-09	0
Klebsiella oxytoca	0.10264	3.4498e-06	1.45272e-06	0.46875	2.4321e-06	7.70227e-07	0.578125	4.50928e-05	1.02345e-05
Streptococcus pyogenes	0.106995	9.22033e-06	1.15043e-05	0.21875	1.31261e-05	5.5118e-06	0.46875	1.88923e-05	1.29176e-05
Peptostreptococcus anaerobius	0.106995	2.9705e-06	5.65602e-06	0.9375	7.45146e-06	1.894e-05	0.578125	4.10183e-06	2.5966e-06
Klebsiella variicola/pneumoniae	0.106995	2.15657e-05	3.2023e-06	0.8125	0.000145202	3.38508e-05	0.578125	0.000330872	3.69356e-05
Clostridium spiroforme	0.106995	3.62427e-05	1.1971e-05	1	1.72501e-05	1.50404e-05	0.46875	6.16257e-06	4.87755e-06
Solobacterium moorei	0.106995	4.03567e-06	7.12686e-06	0.9375	9.03074e-06	2.93277e-05	0.296875	6.57261e-06	4.07064e-06
Bacteroides clarus	0.106995	0.000414032	0.000487341	0.9375	0.00053941	0.000539399	0.21875	0.000644405	0.00193699
Granulicatella adiacens	0.106995	1.93452e-06	2.81203e-06	0.375	3.15133e-06	2.07779e-06	0.9375	3.92454e-06	4.25461e-06
Coprococcus eutactus	0.120544	0.0012262	0.00306322	0.8125	0.000177553	9.89405e-05	0.9375	0.00109097	0.00109564
Bacteroides xylanisolvens	0.120544	0.00404205	0.00654285	0.21875	0.00543146	0.00643432	0.15625	0.0084126	0.0122144
Eubacterium ventriosum	0.120544	0.000532252	0.000759768	0.375	0.000946823	0.000565152	0.296875	0.000729788	0.000578217
Anaerococcus vaginalis	0.124175	2.66252e-07	1.38321e-06	0.46875	2.4596e-06	3.96637e-07	0.078125	1.07858e-06	3.02958e-07
Anaerococcus lactolyticus	0.12609	7.20643e-08	8.3094e-08	0.583882	5.37508e-08	1.09797e-07	0.280713	4.55202e-08	1.64942e-08
Prevotella veroralis	0.126279	9.26224e-07	1.65375e-06	0.36131	7.95652e-06	4.37065e-06	0.833935	3.34986e-06	2.78089e-06
Coprococcus catus	0.135376	0.000659241	0.000747781	0.8125	0.000428723	0.000618016	0.375	0.000537967	0.000417663
Prevotella dentalis	0.142368	3.09458e-06	5.44077e-06	0.142213	4.12541e-05	1.54885e-05	0.418492	6.13812e-06	5.36307e-06
Mobiluncus mulieris	0.148779	3.21953e-06	2.10428e-06	0.6875	2.08228e-06	2.4923e-06	0.294507	4.10888e-06	1.47082e-06
Tannerella forsythia	0.148779	2.61585e-06	2.24379e-06	0.21875	1.12315e-05	2.08368e-05	0.9375	4.30631e-06	4.42415e-06
Gemella sanguinis	0.151428	1.90921e-06	2.62867e-06	0.8125	5.18436e-06	3.62423e-06	0.15625	4.12346e-06	2.09667e-06
Neisseria mucosa	0.153576	4.24717e-07	1.80199e-07	0.418492	1.27621e-07	7.81056e-08	0.375	7.16257e-07	5.51672e-07
Citrobacter youngae	0.155132	9.49295e-07	1.12418e-07	0.418492	2.10715e-07	5.07721e-07	0.787406	5.90363e-07	2.15725e-06
Klebsiella pneumoniae/Klebsiella variicola group	0.155132	8.03748e-07	5.28834e-08	0.833935	5.84556e-06	5.07891e-07	0.529368	1.32178e-05	4.64549e-07
Treponema denticola	0.167254	1.46251e-06	1.14587e-06	0.296875	7.86862e-07	1.05022e-06	0.529368	7.68878e-07	1.021e-06
Blautia hydrogenotrophica	0.168823	0.000169053	0.000130825	0.8125	0.000232514	0.000244855	0.8125	0.000211836	0.000339126
Mitsuokella multacida	0.168823	7.0932e-06	3.5029e-05	0.578125	0.000800692	0.000964109	0.296875	0.00349431	0.0130926
Lachnospiraceae oral taxon 107	0.168823	2.38574e-05	1.85376e-05	0.375	1.38384e-05	2.02271e-05	0.578125	1.92375e-05	1.558e-05
Filifactor alocis	0.169811	2.18093e-07	5.23196e-07	0.529368	1.11375e-07	1.14957e-07	0.0590582	1.0931e-07	9.05717e-09
Lactococcus garvieae	0.17753	9.38732e-08	1.29421e-08	0.583882	2.01537e-07	4.64042e-08	1	2.34767e-08	0
Prevotella oulorum	0.181449	3.48547e-08	1.51753e-07	NA	0	0	1	8.34183e-07	1.1193e-06
Anaerococcus hydrogenalis	0.181449	0	3.60846e-08	1	9.73446e-08	8.13697e-09	0.100348	4.90935e-08	1.79386e-08
Streptococcus porcinus	0.181449	4.037e-09	0	1	1.83756e-09	0	NA	0	0
Enterobacter asburiae	0.181449	6.71154e-08	0	0.36131	3.11603e-07	2.97299e-08	1	8.27237e-08	3.17141e-08
Lactobacillus gasseri	0.187401	6.93311e-08	7.20122e-07	0.833935	3.82933e-07	5.26584e-07	0.9375	8.19397e-07	4.68358e-07
Mobiluncus curtisii	0.187622	1.39719e-05	1.04518e-05	0.6875	7.65443e-06	9.25982e-06	0.9375	3.8573e-06	3.91267e-06
Streptococcus pneumoniae	0.187622	3.35041e-06	4.15965e-06	0.375	9.89168e-06	4.27724e-06	0.6875	7.64886e-06	3.98028e-06
Bacteroides eggerthii	0.187622	0.00304832	0.00636699	0.375	0.0251853	0.0369276	0.46875	0.00397698	0.00525066
Parascardovia denticolens	0.201243	1.72327e-07	5.85382e-08	0.181449	9.06433e-08	1.93092e-08	NA	0	0
Clostridium methylpentosum	0.207764	8.99049e-05	7.62523e-05	1	5.16244e-05	6.55204e-05	0.015625	4.51295e-05	3.48184e-05
[Clostridium] difficile	0.207764	0.000195773	0.000265529	0.296875	0.000158185	0.000106005	0.46875	0.000130366	0.000110705
Lactobacillus delbrueckii	0.207764	2.77251e-05	4.60642e-06	0.078125	9.59907e-07	1.25848e-07	1	1.33796e-05	9.46318e-06
Streptococcus suis	0.207764	2.11377e-05	2.06964e-05	0.8125	1.97982e-05	1.50855e-05	0.375	3.40814e-05	2.72938e-05
Fusobacterium nucleatum	0.208413	4.97045e-08	4.44808e-09	0.583882	4.01128e-08	6.45346e-09	0.201243	1.80284e-07	1.50063e-08
unclassified Ruminococcus sp. 5_1_39BFAA	0.229309	0.00265408	0.0023424	0.9375	0.00186013	0.00168946	0.6875	0.00460571	0.00117439
Bifidobacterium adolescentis	0.229309	0.0100033	0.00784922	0.9375	0.00779549	0.00862186	0.078125	0.00971984	0.00727959
Methanobrevibacter smithii	0.232966	0.000487344	0.000584897	0.03125	6.8836e-05	7.41566e-05	0.855132	0.000246356	0.00173614
Lactobacillus reuteri	0.233953	2.81639e-08	1.21268e-07	0.36131	2.32616e-06	1.17312e-07	0.100348	4.50267e-06	2.36634e-06
Parvimonas sp. oral taxon 393	0.236137	6.31513e-08	5.87578e-08	0.418492	4.68305e-07	1.9718e-07	0.833935	9.67487e-08	1.01804e-07
Dialister invisus	0.25238	0.00328282	0.00376182	0.46875	0.00129897	0.00135559	0.046875	2.95908e-05	2.07251e-05
unclassified Clostridium sp. HGF2	0.25238	0.000131747	6.04237e-05	0.46875	9.18681e-05	4.17129e-05	0.8125	3.51091e-05	2.82005e-05
Victivallis vadensis	0.25238	0.000618211	0.000214676	1	1.33391e-05	3.55438e-05	1	7.04835e-06	4.81775e-06
Porphyromonas asaccharolytica	0.25238	7.05604e-06	8.62657e-06	0.578125	1.97578e-05	5.79152e-06	0.8125	3.09989e-06	4.68111e-06
Providencia rettgeri	0.262193	7.91399e-07	1.33022e-07	0.296875	1.59002e-07	1.87864e-07	1	3.27977e-07	1.03351e-07
Klebsiella pneumoniae	0.262193	8.70964e-07	8.74471e-08	0.589639	2.25299e-06	8.92143e-07	0.589639	6.96873e-06	1.57144e-06
Lactobacillus johnsonii	0.266402	3.76282e-08	5.16879e-08	0.787406	1.96191e-07	1.86689e-08	0.583882	2.95172e-07	1.21614e-07
Fusobacterium mortiferum	0.271899	1.98437e-07	2.86716e-08	0.100348	1.08669e-05	0.000228268	0.17753	1.23601e-08	1.75003e-07
[Ruminococcus] obeum	0.276855	0.00199361	0.00229068	0.296875	0.00339994	0.00192848	0.578125	0.00148373	0.000974883
Peptostreptococcus stomatis	0.276855	1.03181e-06	1.83727e-06	0.8125	2.18807e-06	1.1114e-05	0.296875	2.77037e-06	1.02973e-06
Clostridium butyricum	0.280713	1.90825e-09	1.67543e-08	1	3.77697e-08	0	0.201243	1.53208e-08	4.86956e-08
Neisseria sicca/macacae	0.280713	1.28385e-07	1.95675e-08	0.422678	6.89664e-08	3.09384e-08	0.789268	6.27619e-08	7.97838e-08
Lactobacillus rhamnosus	0.280713	1.26536e-08	2.51427e-07	0.181449	6.67662e-08	2.87946e-09	0.181449	7.77832e-08	1.77088e-08
Thermoanaerobacter pseudethanolicus	0.293622	2.18077e-07	1.36829e-07	0.589639	2.69747e-07	6.49522e-07	1	1.17185e-08	1.02825e-08
Ethanoligenens harbinense	0.293622	8.56598e-07	9.79586e-07	0.181449	4.83506e-07	2.72133e-07	1	1.34666e-06	1.85859e-06
Lactobacillus oris	0.293622	2.50883e-07	1.59142e-06	0.201243	1.27253e-07	5.48475e-08	1	1.7224e-07	2.22748e-07
Bacteroides coprosuis	0.294507	1.22959e-05	1.57796e-05	0.8125	1.6399e-05	1.12925e-05	0.674987	2.94321e-06	1.6265e-06
unclassified Lachnospiraceae bacterium 9_1_43BFAA	0.302795	7.72856e-05	2.94262e-05	0.9375	2.96765e-05	2.8582e-05	0.8125	1.81202e-05	2.88142e-05
Eubacterium cylindroides	0.302795	0.000256709	0.000256808	0.21875	0.000148351	6.96859e-05	0.578125	0.000122844	0.00011667
[Bacteroides] pectinophilus	0.302795	0.000423605	0.000401592	0.375	0.000208131	0.000284405	0.296875	0.000199224	0.000168625
Campylobacter hominis	0.306556	8.91202e-07	2.22775e-06	1	1.98464e-06	1.72676e-06	1	1.66364e-06	1.70221e-06
Shuttleworthia satelles	0.308063	3.69771e-08	9.12934e-08	1	8.16432e-08	9.86705e-08	1	8.0186e-08	6.53698e-08
Clostridium phytofermentans	0.3268	1.4965e-06	2.6557e-06	0.100348	3.21125e-07	0	0.36131	1.66026e-06	2.01485e-06
Enterococcus faecium	0.330261	4.88149e-05	3.84535e-05	1	0.000148198	0.000142513	0.46875	4.17259e-05	2.98327e-05
Bilophila wadsworthia	0.330261	0.00280649	0.00168649	0.9375	0.00510224	0.00481853	0.674987	0.00134976	0.00115421
Streptococcus dysgalactiae	0.330261	1.39073e-05	1.76682e-05	0.8125	3.10551e-05	2.84122e-05	0.296875	2.27803e-05	1.78757e-05
Bifidobacterium bifidum	0.330261	0.0020326	0.001436	0.8125	0.00635997	0.00464686	0.6875	0.00478769	0.00224796
Bacteroides plebeius	0.330261	0.00409907	0.00500786	0.6875	0.00207823	0.0076264	0.9375	0.00657808	0.00280679
Campylobacter concisus	0.350529	1.60182e-07	4.38696e-08	0.855132	8.78735e-07	5.77473e-08	0.03125	2.28434e-06	4.57167e-07
Prevotella tannerae	0.359131	5.82485e-06	7.49196e-06	0.21875	1.45525e-05	1.64692e-05	0.294507	6.84482e-06	1.16289e-05
Bifidobacterium dentium	0.359131	0.000150533	0.000120548	0.9375	0.000141004	0.000145561	0.015625	0.00035982	0.000161649
Oribacterium sinus	0.359131	1.5787e-06	1.97686e-06	0.46875	2.21634e-06	1.85739e-06	0.578125	4.88239e-06	7.62095e-06
Prevotella copri	0.359131	0.0203452	0.0220765	0.578125	0.0294621	0.00784274	0.8125	0.0244715	0.0218271
Enterobacter cloacae	0.359131	7.18918e-06	1.43274e-06	0.9375	8.87041e-06	5.94052e-06	0.6875	9.64639e-05	2.83216e-06
Bacteroides caccae	0.359131	0.00479999	0.0028904	0.9375	0.00616168	0.00579084	0.296875	0.00557256	0.009245
Eubacterium hallii	0.359131	0.00222827	0.00217869	0.9375	0.00173167	0.00138389	0.15625	0.00243809	0.00112134
unclassified Clostridium sp. 7_2_43FAA	0.359131	4.61009e-06	3.95003e-06	0.296875	2.78365e-06	1.5695e-06	0.046875	1.87334e-06	3.27028e-06
Dorea formicigenerans	0.359131	0.00124379	0.00140441	0.9375	0.00095039	0.00109789	0.46875	0.00146311	0.00061772
Acinetobacter baumannii	0.36131	1.28529e-08	2.66213e-09	0.674987	3.36318e-07	5.16027e-07	1	8.34464e-08	3.30272e-08
Helicobacter winghamensis	0.36131	4.06732e-08	1.06605e-07	NA	0	0	1	4.4208e-08	0
Neisseria elongata	0.36131	3.52015e-08	9.741e-09	NA	0	0	1	5.46607e-08	0
Atopobium rimae	0.36131	5.13476e-07	1.77026e-08	0.181449	5.59509e-08	1.25823e-08	0.371093	0	5.49369e-08
Lactobacillus helveticus	0.36131	3.21866e-08	1.27366e-07	1	1.11949e-07	4.68462e-08	1	1.10105e-08	5.02318e-08
Lactobacillus antri	0.36131	1.7271e-08	1.98014e-07	0.789268	5.19899e-08	1.68604e-08	0.181449	3.22849e-08	0
Lactobacillus coryniformis	0.36131	7.4372e-09	1.07416e-07	1	1.02655e-08	1.09718e-08	0.371093	0	1.24994e-08
Scardovia inopinata	0.36131	5.32584e-09	1.26073e-08	0.181449	2.82582e-06	8.54614e-08	1	5.57153e-07	1.27292e-07
Dehalococcoides mccartyi	0.36131	5.09366e-08	2.25571e-08	1	0	2.03424e-08	1	0	1.03028e-08
Aeromonas veronii	0.36131	1.68039e-08	3.63303e-09	NA	0	0	NA	0	0
Methanosphaera stadtmanae	0.362727	5.15997e-06	7.14544e-06	0.422678	7.11379e-08	2.76651e-05	NA	0	0
unclassified Citrobacter sp. 30_2	0.366986	1.431e-05	1.35877e-06	0.578125	5.94654e-06	1.62543e-05	0.674987	4.44669e-06	3.5927e-05
Vibrio cholerae	0.371093	4.9191e-08	0	NA	0	0	1	2.03293e-07	4.81462e-08
unclassified Peptoniphilus sp. oral taxon 375	0.371093	4.39935e-09	4.71114e-08	1	4.55273e-08	5.37613e-08	NA	0	0
Methylocella silvestris	0.371093	0	6.09324e-08	1	1.5928e-06	1.10088e-07	NA	0	0
Erwinia pyrifoliae	0.371093	1.77221e-07	0	NA	0	0	1	3.97078e-08	0
Streptococcus criceti	0.371093	3.29523e-08	0	1	1.43971e-07	0	NA	0	0
Serratia odorifera	0.371093	8.66303e-08	0	1	4.20389e-08	0	0.371093	1.51597e-07	0
Lactobacillus ultunensis	0.371093	0	2.19666e-08	1	5.47043e-09	1.37148e-08	1	0	9.70107e-09
Proteus penneri	0.371093	3.31306e-08	0	1	0	8.9346e-09	1	1.2463e-08	7.40863e-09
Clostridium sporogenes/botulinum	0.371093	0	3.6016e-08	1	9.10607e-08	6.91214e-08	1	2.22413e-07	1.24737e-07
Burkholderia multivorans	0.371093	8.17731e-08	2.63445e-09	0.583882	1.58345e-06	2.6094e-08	0.583882	3.59639e-08	3.35844e-07
Pantoea ananatis	0.371093	9.38661e-09	0	1	2.53653e-08	1.06409e-08	1	3.56065e-08	4.95396e-09
Lactobacillus brevis	0.371093	0	5.05595e-08	NA	0	0	NA	0	0
Neisseria polysaccharea	0.371093	3.25978e-08	0	NA	0	0	NA	0	0
Phascolarctobacterium succinatutens	0.389404	0.00056764	0.000590634	0.578125	5.11034e-05	0.000131665	0.15625	1.33767e-05	1.09709e-05
Prevotella oris	0.389404	1.88842e-05	2.8828e-05	0.578125	4.39469e-05	4.15718e-05	0.078125	1.16665e-05	1.72297e-05
unclassified Erysipelotrichaceae bacterium 5_2_54FAA	0.389404	0.000202608	0.000198063	0.6875	0.00013153	0.000161572	0.015625	8.88894e-05	6.68295e-05
Ruminococcus flavefaciens	0.389404	9.16311e-06	6.84052e-06	0.6875	7.62701e-06	9.38351e-06	0.375	4.76752e-06	4.29139e-06
Haemophilus pittmaniae	0.389404	1.87411e-05	5.32889e-06	0.6875	1.62941e-05	1.14421e-05	0.46875	5.18485e-06	2.09292e-05
Ruminococcus albus	0.389404	3.42678e-05	5.76702e-05	0.8125	2.8196e-05	2.75575e-05	0.833935	2.31075e-05	2.23298e-05
Roseburia intestinalis	0.389404	0.00280144	0.00418758	0.8125	0.001599	0.00130757	1	0.00415767	0.00351022
Prevotella buccae	0.389404	3.96958e-05	3.02807e-05	0.8125	4.29942e-06	1.13887e-05	0.6875	1.5189e-06	1.45253e-06
Marvinbryantia formatexigens	0.389404	5.45134e-05	5.54352e-05	0.8125	0.000138952	8.30862e-05	0.46875	5.50127e-05	5.14417e-05
Lactococcus lactis	0.389404	3.87598e-05	1.66233e-05	0.375	5.3683e-05	4.32184e-05	0.46875	4.22246e-05	4.99941e-06
Rhodospirillum rubrum	0.401678	1.61823e-06	3.00368e-06	0.589639	4.10493e-07	1.48251e-06	0.371093	1.79807e-06	7.05311e-07
Prevotella salivae	0.401678	2.67846e-08	8.48912e-08	1	1.26305e-07	4.99067e-07	0.36131	7.8327e-08	1.45959e-07
unclassified Streptococcus sp. M334	0.406941	9.15159e-08	1.26753e-07	0.855132	3.52056e-07	1.31075e-07	0.294507	2.18186e-07	1.13829e-07
Streptococcus equinus	0.406941	3.31585e-08	5.14617e-08	1	3.73083e-08	3.87349e-08	0.280713	1.83642e-07	2.89932e-08
Streptococcus peroris	0.410117	7.90728e-08	1.07329e-07	0.294507	1.45971e-07	8.98306e-08	1	2.66354e-07	5.65661e-08
unclassified Desulfovibrio sp. 3_1_syn3	0.414446	0.000111366	3.89257e-06	0.296875	4.9416e-06	5.95952e-06	0.17753	0.000101248	0.000271484
Finegoldia magna	0.414823	4.13651e-07	3.14653e-07	0.787406	7.19332e-07	3.30704e-07	0.578125	1.92499e-07	1.44504e-07
Neisseria meningitidis	0.418492	2.0418e-08	7.15759e-09	1	1.21562e-08	1.16941e-08	0.787406	8.09597e-08	9.53319e-08
Gemella morbillorum	0.418492	7.82119e-09	3.19839e-08	1	2.68389e-08	4.00244e-08	0.789268	8.82665e-08	6.52053e-08
Clostridium botulinum	0.418492	2.40632e-09	7.64929e-09	0.371093	1.06015e-08	2.3783e-09	1	6.57025e-08	2.61981e-08
Shewanella putrefaciens	0.418492	1.67592e-07	6.4285e-09	0.789268	6.08423e-07	1.8376e-08	1	8.2611e-08	4.90934e-08
Streptococcus parauberis	0.418492	3.51115e-08	1.16951e-08	0.583882	9.55961e-08	3.54187e-08	1	5.14204e-08	1.48118e-08
Anaerococcus prevotii	0.418492	8.29117e-09	2.09721e-08	1	7.88573e-08	7.61301e-08	0.371093	1.40365e-08	2.76028e-08
Ruminococcus champanellensis	0.421204	7.74998e-05	0.000103183	0.375	4.58457e-05	6.61142e-05	1	4.34235e-05	4.36013e-05
Parabacteroides merdae	0.421204	0.00648079	0.00604672	0.8125	0.00520116	0.00596446	1	0.00514695	0.00717128
Micrococcus luteus	0.422678	1.53453e-09	7.63804e-09	NA	0	0	1	2.75811e-08	1.33445e-08
Actinobacillus minor	0.422678	5.89881e-08	9.98867e-09	1	1.26633e-08	0	0.371093	1.01753e-07	0
Lactobacillus sakei	0.422678	3.6788e-08	8.07572e-09	1	0	2.13879e-08	1	2.26303e-08	2.96634e-08
Ureaplasma urealyticum	0.422678	2.23563e-09	5.39068e-08	1	2.03683e-08	4.40414e-08	1	7.79993e-09	1.80683e-08
Escherichia albertii	0.441209	2.61104e-07	1.12928e-07	0.855132	9.04652e-08	6.54627e-07	0.789268	3.57499e-08	7.48878e-08
unclassified Fusobacterium	0.442046	2.20287e-07	1.57016e-07	1	1.01714e-06	5.76556e-07	0.296875	1.02138e-06	3.04262e-07
Streptococcus pseudoporcinus	0.446873	6.55372e-08	9.54688e-08	0.371093	2.81647e-07	5.42809e-08	1	6.30658e-08	3.86115e-08
Clostridium symbiosum	0.454285	0.000396378	0.000351498	0.21875	0.000380766	0.000303686	0.46875	0.000375978	0.000327951
Eggerthella lenta	0.454285	0.000360754	0.000347205	0.8125	0.000813177	0.000444761	0.578125	0.000135248	0.000127743
Megasphaera micronuciformis	0.454285	6.70957e-07	5.7445e-07	0.6875	1.39838e-06	1.29629e-06	0.375	1.03074e-05	7.74317e-06
Bacteroides coprophilus	0.454285	0.000995845	0.00110767	0.578125	0.000551558	0.000723429	1	0.000558058	0.000519931
Paraprevotella xylaniphila	0.454285	0.000405868	0.000425177	0.578125	0.000354531	0.00023706	0.9375	0.000443213	0.000299898
Streptococcus gallolyticus	0.454285	3.31483e-06	4.94548e-06	0.8125	9.95534e-06	2.15361e-05	0.109375	4.57656e-05	2.39427e-06
Weissella cibaria	0.454285	2.31411e-07	3.15028e-06	0.375	1.1907e-07	9.61318e-08	0.294507	1.05952e-06	1.80599e-07
Prevotella bivia	0.454285	0.000122149	0.000155935	0.578125	0.000166241	0.000135866	0.578125	0.000159856	0.000158696
unclassified Streptococcus oralis	0.456126	2.25382e-07	1.44943e-07	0.674987	1.99375e-07	1.95668e-07	0.9375	3.41205e-07	2.42337e-07
Clostridiales genomosp. BVAB3	0.484642	4.52007e-06	5.2033e-06	0.529368	2.43176e-06	1.99541e-06	0.280713	1.71742e-06	2.22791e-06
Blautia hansenii	0.488708	0.000141293	0.000160651	0.578125	0.00019714	0.000202219	1	8.34805e-05	6.72139e-05
Prevotella timonensis	0.488708	2.84389e-05	2.94176e-05	0.375	4.93151e-05	4.24937e-05	0.078125	1.95947e-05	2.88019e-05
butyrate-producing bacterium SSC/2	0.488708	0.000160723	0.000210599	0.9375	0.000128922	0.000111575	0.078125	0.000377458	0.000139171
Lactobacillus casei	0.488708	3.0964e-06	2.32468e-05	0.078125	3.52017e-06	4.87107e-07	0.578125	7.59987e-06	2.75296e-06
unclassified Lachnospiraceae bacterium 2_1_46FAA	0.488708	1.25901e-05	1.25854e-05	0.296875	1.59994e-05	1.14175e-05	0.9375	1.6665e-05	9.15515e-06
unclassified Clostridium sp. L2-50	0.488708	0.000555367	0.000821252	0.6875	0.00107445	0.00184838	0.6875	0.00228786	0.00296346
Pseudoflavonifractor capillosus	0.488708	0.00030119	0.000252617	0.296875	0.000318221	0.000244376	0.46875	0.000300055	0.000212823
unclassified Eggerthella sp. YY7918	0.489854	2.37325e-05	2.11898e-05	0.578125	1.17105e-05	5.69553e-06	0.674987	9.23778e-06	8.66773e-06
Peptoniphilus harei	0.489854	8.45785e-07	1.59902e-06	0.46875	2.02346e-06	1.84675e-06	0.15625	7.93954e-07	5.08076e-07
Aggregatibacter aphrophilus	0.50488	8.04446e-07	3.68633e-07	0.280713	2.89972e-07	2.86985e-08	0.401678	3.12467e-07	7.80125e-07
Prevotella multisaccharivorax	0.50488	6.98242e-06	1.63253e-05	0.280713	2.42653e-05	5.21544e-06	0.589639	2.4277e-05	3.94347e-05
Clostridium kluyveri	0.504903	1.17582e-06	1.96358e-06	0.15625	1.80092e-06	1.40637e-06	1	3.25607e-08	0
Oxalobacter formigenes	0.524475	6.91233e-05	8.29125e-05	0.8125	4.20625e-06	3.77247e-06	0.294507	2.32212e-06	1.36183e-06
Anaerofustis stercorihominis	0.524475	1.13191e-06	1.01398e-06	0.375	1.37236e-06	7.03766e-07	1	1.02801e-06	6.02367e-07
Bacteroides helcogenes	0.524475	1.61445e-05	1.75711e-05	0.8125	3.13521e-05	4.29857e-05	0.9375	7.2615e-06	7.44642e-06
unclassified butyrate-producing bacterium SS3/4	0.524475	0.000805193	0.000938477	0.375	0.000927093	0.000935657	0.9375	0.00143775	0.00147424
Streptococcus oralis	0.524475	1.27168e-06	1.06992e-06	0.21875	1.84454e-06	1.1984e-06	0.9375	2.13733e-06	1.68333e-06
Olsenella uli	0.528612	7.88178e-07	6.79748e-07	0.371093	8.91294e-09	6.4289e-08	0.181449	1.55893e-07	5.83501e-08
Neisseria subflava	0.528612	5.1982e-08	8.8195e-08	0.787406	1.01431e-07	5.79412e-08	0.833935	3.22622e-07	1.75697e-07
Lactobacillus vaginalis	0.528612	9.32581e-07	3.24402e-06	0.789268	3.668e-07	1.57627e-07	0.589639	7.46838e-08	1.43987e-07
unclassified Enterobacteriaceae bacterium 9_2_54FAA	0.529368	6.30542e-07	1.06812e-07	0.375	2.77095e-07	4.24283e-07	0.855132	9.19611e-07	1.99777e-07
Succinatimonas hippei	0.529368	5.00874e-08	2.31467e-07	1	9.43643e-07	2.80171e-07	1	3.78674e-09	1.36392e-08
Eubacterium saphenum	0.530158	9.60251e-07	8.22648e-07	0.8125	7.98869e-07	1.14933e-06	0.589639	4.67053e-07	3.65989e-07
Lactobacillus crispatus	0.553617	4.17844e-07	3.36703e-06	0.0934925	3.62526e-07	2.70139e-08	0.401678	9.49486e-07	5.19778e-07
Prevotella multiformis	0.554113	3.72388e-07	1.10471e-06	0.422678	7.50902e-06	2.71542e-06	0.787406	2.81175e-06	3.409e-06
Streptococcus agalactiae	0.554113	5.37649e-08	1.47282e-07	0.789268	4.60203e-08	2.07207e-08	0.855132	1.22837e-08	1.23898e-08
Gardnerella vaginalis	0.554113	3.49727e-08	2.80609e-08	1	2.41481e-07	4.57965e-08	1	3.8479e-08	7.01087e-08
Bacteroides finegoldii	0.561401	0.000861514	0.00090174	0.6875	0.0014602	0.00158194	0.296875	0.000352053	0.000432313
[Clostridium] bartlettii	0.561401	7.94677e-05	0.000102115	0.109375	0.000150553	7.94116e-05	0.21875	8.30149e-05	9.45113e-05
Slackia exigua	0.561401	1.19909e-06	1.53981e-06	0.375	1.53323e-06	2.55151e-06	0.578125	5.75533e-07	8.05166e-07
Collinsella intestinalis	0.561401	7.67722e-06	8.18635e-06	0.6875	5.34864e-06	5.39007e-06	0.6875	1.94311e-05	1.0528e-05
Sutterella wadsworthensis	0.561401	0.00139522	0.001203	0.578125	0.00314743	0.00458828	0.8125	0.00957956	0.0156282
Roseburia hominis	0.561401	0.00328498	0.00361028	1	0.000787667	0.00111164	0.109375	0.00452287	0.00151762
Butyrivibrio crossotus	0.561401	0.000568465	0.000206204	0.578125	0.00243547	0.00280869	0.21875	0.000129847	0.000106427
Streptococcus infantis	0.561401	6.55002e-06	7.54445e-06	0.375	8.49195e-06	5.85866e-06	0.8125	1.62251e-05	7.56867e-06
Bacteroides dorei/vulgatus	0.561401	0.0483837	0.047906	0.578125	0.0309643	0.030013	0.03125	0.0272322	0.0517078
Bacteroides intestinalis	0.561401	0.00168852	0.00143884	0.375	0.000737845	0.000812227	0.03125	0.000608023	0.00114919
Actinomyces viscosus	0.561401	8.89239e-06	1.25946e-05	0.21875	1.94888e-05	1.10201e-05	0.9375	1.71769e-05	2.4024e-05
unclassified Actinomyces sp. oral taxon 180	0.563318	1.23374e-07	1.61545e-07	0.789268	1.45678e-07	1.26694e-07	0.529368	9.2469e-08	2.55179e-07
Streptococcus cristatus	0.572082	2.7073e-07	2.278e-07	0.578125	4.66454e-07	3.59404e-07	0.401678	5.50023e-07	1.6116e-07
Desulfovibrio desulfuricans	0.583882	1.03235e-07	1.359e-08	1	1.33431e-06	1.32513e-06	0.371093	3.05774e-07	6.88943e-07
Lautropia mirabilis	0.583882	2.34962e-07	2.73747e-07	0.789268	6.19818e-07	1.02197e-06	1	9.25094e-07	2.39096e-06
Dialister micraerophilus	0.583882	4.60154e-08	7.48404e-08	1	6.41739e-08	2.96889e-08	0.201243	2.29658e-08	5.0118e-09
Mannheimia haemolytica	0.583882	3.892e-08	1.25534e-08	NA	0	0	NA	0	0
Acholeplasma laidlawii	0.589639	2.96798e-06	3.7398e-06	1	9.93191e-07	2.93371e-06	NA	0	0
Listeria seeligeri	0.589639	1.35449e-08	2.17741e-08	1	0	1.1165e-08	1	1.03173e-07	9.94729e-09
Coriobacterium glomerans	0.589639	1.10191e-07	1.37312e-07	1	4.15117e-08	3.71497e-08	0.371093	1.2065e-07	5.36151e-08
Streptococcus urinalis	0.589639	3.61075e-08	1.05911e-07	0.789268	1.33769e-07	1.11187e-07	0.371093	2.1659e-07	1.82509e-08
Corynebacterium glucuronolyticum	0.589639	2.84068e-08	1.83239e-08	0.17753	3.03133e-07	8.86931e-08	0.181449	3.42472e-06	6.48976e-07
Holdemania filiformis	0.599487	0.000291536	0.00031415	0.46875	0.000493668	0.000372487	0.6875	0.000215531	0.000231729
Odoribacter splanchnicus	0.599487	0.00248786	0.00228475	0.15625	0.00244742	0.0035002	0.6875	0.00290803	0.00125643
butyrate-producing bacterium	0.599487	0.00139594	0.00180597	1	0.00110482	0.00108162	0.109375	0.00345094	0.00117249
Megasphaera elsdenii	0.599487	4.66796e-05	3.1849e-05	0.9375	0.000268848	0.000433144	0.296875	0.00286479	0.00207656
Streptococcus sanguinis	0.599487	1.55292e-05	8.53446e-06	0.375	1.65597e-05	2.24535e-05	0.15625	3.35255e-05	8.7091e-06
Eubacterium dolichum	0.599487	5.30903e-05	5.3637e-05	0.375	5.40173e-05	3.57023e-05	0.8125	3.85504e-05	3.83185e-05
Bacteroides dorei	0.599487	0.0348859	0.0343901	0.578125	0.0268163	0.0249695	0.03125	0.0223974	0.0375264
Streptococcus infantarius	0.615519	2.84354e-06	2.07808e-06	0.078125	1.5533e-06	6.01286e-07	0.21875	3.0076e-06	9.17377e-07
Prevotella pallens	0.6247	1.726e-06	1.40621e-05	0.208413	1.48867e-05	5.17284e-06	0.208413	4.41709e-05	2.06657e-05
Prevotella bryantii	0.624835	1.59986e-05	2.41613e-05	0.529368	2.14045e-05	1.24537e-05	0.401678	7.73568e-05	8.12833e-05
Prevotella denticola	0.624835	2.96113e-05	2.80576e-05	0.418492	1.19559e-05	1.42143e-05	1	4.91696e-05	3.77847e-05
Neisseria flavescens	0.635586	2.23199e-07	6.6976e-08	0.418492	6.7284e-08	2.67967e-08	0.280713	2.14787e-07	1.01379e-07
Fusobacterium gonidiaformans	0.635586	1.12785e-07	7.06658e-08	0.280713	2.65898e-06	3.84577e-05	0.105645	5.0686e-06	2.5519e-06
Enterobacter hormaechei/cloacae	0.638672	7.7684e-05	9.12922e-07	1	1.56423e-05	6.54419e-05	0.9375	0.000243943	5.13535e-06
Eubacterium saburreum	0.638672	3.96727e-06	4.72407e-06	0.6875	6.46117e-06	6.22798e-06	0.15625	4.72028e-06	3.32651e-06
Treponema vincentii	0.638672	1.93224e-06	2.26921e-06	0.375	1.7583e-06	2.6001e-06	0.0360317	2.08429e-06	1.53883e-06
unclassified Ruminococcaceae bacterium D16	0.638672	0.000814401	0.000692126	0.578125	0.000411066	0.000330929	0.9375	0.000385439	0.000383663
Streptococcus gordonii	0.638672	5.11889e-06	5.617e-06	0.078125	1.14242e-05	4.95933e-06	0.296875	1.06765e-05	7.88301e-06
unclassified Peptoniphilus sp. oral taxon 386	0.666137	4.72646e-08	7.10965e-08	0.833935	7.98649e-08	8.27661e-08	0.422678	5.28288e-08	9.43989e-08
Aggregatibacter actinomycetemcomitans	0.672604	8.02356e-08	8.17199e-08	1	4.54666e-08	0	0.787406	7.70491e-08	7.91654e-08
unclassified Fusobacterium sp. D12	0.672604	1.75734e-08	9.23405e-09	0.589639	6.56661e-08	1.95046e-07	0.583882	1.21747e-07	4.22983e-08
Burkholderia pseudomallei	0.672604	2.16252e-07	2.91143e-07	0.0590582	7.0653e-08	2.0746e-06	1	1.73134e-07	4.43849e-07
Streptococcus salivarius	0.678772	0.000404723	0.000267268	0.578125	0.000335828	0.000256589	1	0.000518248	0.000138604
Salmonella enterica	0.678772	1.25249e-05	5.13941e-06	0.578125	1.072e-05	3.17208e-06	1	8.48836e-06	2.60326e-06
Clostridium scindens	0.678772	8.80333e-05	0.000135223	1	4.95119e-05	6.10895e-05	0.375	0.000121084	7.67107e-05
Escherichia coli	0.678772	0.0126087	0.00191713	0.578125	0.00300591	0.00318012	0.296875	0.000364987	0.00150747
Bacteroides salanitronis	0.678772	0.000455514	0.000494005	0.078125	0.000100273	0.000128786	0.6875	0.00019264	0.000209899
Faecalibacterium prausnitzii	0.678772	0.0345977	0.0326226	1	0.0362546	0.0320737	0.015625	0.0434251	0.0256123
Streptococcus anginosus	0.678772	7.39733e-06	8.09893e-06	0.375	9.34592e-06	5.368e-06	0.9375	8.1701e-06	5.91958e-06
Bacteroides fragilis	0.678772	0.00533869	0.00364503	0.9375	0.00393273	0.00381901	0.375	0.00354166	0.00552815
Bacillus anthracis/cereus/thuringiensis	0.689084	8.43307e-08	1.70771e-07	1	7.6077e-07	8.22899e-07	1	2.59577e-07	2.58018e-07
Lactobacillus amylovorus	0.706427	1.67744e-06	3.79887e-06	0.296875	5.23806e-06	2.40133e-06	0.0591721	1.3107e-06	6.75977e-07
Desulfovibrio piger	0.719727	0.000591499	0.00095078	0.078125	0.000474271	0.000561336	0.142213	9.61641e-08	8.4161e-07
Bacteroides stercoris	0.719727	0.00281764	0.0031837	0.9375	0.0200073	0.0151036	0.109375	0.00165205	0.00250125
[Ruminococcus] torques	0.719727	0.00278551	0.00258493	0.8125	0.00231308	0.00283917	0.9375	0.00114294	0.00149591
Clostridium saccharolyticum	0.719727	0.000645743	0.000675002	0.46875	0.000749937	0.000631205	0.46875	0.000504176	0.000426449
Leuconostoc mesenteroides	0.719727	3.3734e-06	4.45582e-06	0.375	3.45306e-07	9.94273e-07	0.015625	1.02307e-05	1.43018e-07
Citrobacter koseri	0.719727	1.59721e-05	2.26896e-06	0.375	2.96371e-06	3.93453e-06	0.578125	2.5772e-06	2.256e-06
unclassified Veillonella sp. oral taxon 158	0.719727	1.98246e-05	1.24008e-05	0.578125	1.31803e-05	1.60394e-05	0.15625	8.29887e-05	1.85264e-05
Parabacteroides distasonis	0.719727	0.00805727	0.00767045	0.375	0.00741541	0.00852039	0.078125	0.00502729	0.00783975
Streptococcus mutans	0.719727	6.42399e-06	5.38784e-06	0.8125	4.08205e-06	3.31536e-06	0.8125	7.78151e-06	9.44775e-06
unclassified Clostridium sp. D5	0.719727	0.000133975	0.000131387	0.8125	0.000120758	0.000107938	0.46875	0.00011772	8.23943e-05
unclassified Clostridium sp. SY8519	0.719727	1.47999e-05	1.72372e-05	0.46875	1.57976e-05	1.39255e-05	0.21875	2.6082e-05	1.15137e-05
Eubacterium eligens	0.719727	0.00095363	0.00107065	0.296875	0.00110683	0.000794042	0.015625	0.00105316	0.000642766
Streptococcus pseudopneumoniae	0.722283	4.44978e-08	3.61302e-08	0.100348	1.26211e-07	1.16987e-08	0.787406	9.5145e-08	7.76474e-08
Staphylococcus aureus	0.724082	1.89882e-07	1.67003e-07	0.529368	6.4588e-08	9.40537e-08	0.0360317	2.04546e-05	1.00652e-05
Leuconostoc lactis	0.726286	1.18632e-07	5.4278e-08	0.583882	3.80514e-07	2.28002e-07	0.105645	3.32888e-07	2.5855e-09
Eubacterium cellulosolvens	0.726768	1.07546e-06	9.0298e-07	0.589639	7.12636e-07	3.18299e-07	1	2.30211e-06	5.67497e-07
Clostridium hylemonae	0.726768	5.48074e-06	3.41403e-06	0.142213	2.89104e-06	6.15145e-07	0.674987	4.03196e-07	2.2416e-07
Megasphaera genomosp. type 1	0.75361	1.26013e-06	1.27149e-06	1	4.66564e-06	2.02933e-06	0.296875	1.1133e-05	1.17643e-05
Prevotella amnii	0.759766	2.51171e-07	2.21473e-07	0.833935	4.21066e-07	2.03742e-07	0.589639	2.00774e-07	2.3754e-07
Dorea longicatena	0.761536	0.00331443	0.00298481	0.375	0.00381979	0.00292497	0.46875	0.000770255	0.000654027
Bifidobacterium longum	0.761536	0.00528448	0.00588428	0.046875	0.00529135	0.00308742	0.15625	0.0484259	0.035144
unclassified Erysipelotrichaceae bacterium 3_1_53	0.761536	8.2391e-05	8.76686e-05	0.296875	0.000102718	7.64409e-05	0.375	6.96743e-05	6.17026e-05
unclassified Oribacterium sp. oral taxon 078	0.761536	1.27441e-06	1.33833e-06	0.529368	2.96644e-07	4.55302e-07	0.294507	7.83838e-07	1.01568e-06
Parasutterella excrementihominis	0.761536	0.0030694	0.00306388	0.8125	0.000752962	0.000816526	0.401678	0.000261886	0.000246575
Clostridium perfringens	0.761536	5.24359e-06	4.33993e-06	0.375	3.10285e-06	9.96015e-06	0.03125	1.40515e-06	3.45547e-06
unclassified Megasphaera sp. UPII 135-E	0.761536	1.0178e-06	1.25727e-06	0.8125	1.90992e-06	2.36717e-06	0.6875	1.46061e-06	1.13685e-06
[Ruminococcus] gnavus	0.761536	0.000362301	0.000380577	0.8125	0.000583851	0.000627615	0.8125	0.00168891	0.000871736
Abiotrophia defectiva	0.761536	6.55466e-06	5.83193e-06	0.296875	3.00592e-06	4.31049e-06	0.6875	2.21488e-05	2.12109e-05
Enterococcus italicus	0.787406	2.54239e-08	1.85841e-08	NA	0	0	0.181449	8.91564e-08	0
Clostridium proteoclasticum	0.787406	3.823e-08	1.17715e-07	NA	0	0	1	4.51486e-07	5.46788e-08
Kingella denitrificans	0.787406	3.1905e-08	2.20622e-08	0.789268	3.15075e-08	4.06146e-08	0.418492	1.51542e-07	3.92059e-08
Yersinia pseudotuberculosis	0.789268	5.99485e-08	4.60403e-07	1	4.83657e-07	2.32027e-07	1	1.38666e-08	3.8456e-08
Porphyromonas uenonis	0.799846	2.15448e-06	2.08862e-06	0.855132	1.61648e-06	6.76138e-07	0.529368	1.07251e-06	1.15385e-06
Selenomonas artemidis	0.799846	2.59137e-08	3.00765e-08	0.201243	1.59224e-08	3.97567e-08	0.401678	2.54485e-07	2.45804e-07
Collinsella stercoris	0.801732	9.56603e-06	1.10975e-05	0.9375	6.40765e-06	8.37693e-06	0.46875	1.27839e-05	5.12845e-06
Anaerostipes caccae	0.803955	3.93047e-05	4.56299e-05	0.375	5.87982e-05	2.01466e-05	0.21875	2.28724e-05	7.20716e-06
unclassified Lachnospiraceae bacterium 1_4_56FAA	0.803955	4.18706e-05	3.84929e-05	0.6875	8.38856e-05	7.15001e-05	0.15625	2.58209e-05	2.17482e-05
Anaerotruncus colihominis	0.803955	0.000476005	0.000438361	0.6875	0.000564345	0.000434679	0.21875	0.000335601	0.000285097
Actinomyces odontolyticus	0.803955	8.82936e-06	1.25242e-05	0.15625	1.16497e-05	5.05583e-06	1	9.28956e-06	1.71901e-05
Streptococcus vestibularis	0.803955	3.64254e-05	2.94041e-05	0.296875	2.46512e-05	1.59914e-05	1	3.58534e-05	9.21007e-06
Streptococcus australis	0.803955	2.24413e-05	2.03485e-05	0.15625	2.91413e-05	1.46381e-05	0.46875	2.91857e-05	7.52862e-06
Streptococcus parasanguinis	0.803955	8.06175e-05	8.38388e-05	0.15625	6.17585e-05	2.90661e-05	0.9375	0.000101957	3.93387e-05
Lactobacillus acidophilus	0.812704	1.26056e-06	0.000129678	1	3.18012e-06	1.81205e-06	0.36131	2.40235e-08	8.09948e-08
Gemella haemolysans	0.824098	1.01228e-06	1.02452e-06	0.833935	4.46281e-06	1.92843e-06	0.46875	1.4542e-06	1.59358e-06
Prevotella nigrescens	0.833635	1.56215e-06	2.40821e-06	0.855132	6.81698e-08	7.16116e-08	0.789268	1.91876e-07	2.48555e-08
Neisseria cinerea	0.833935	8.06629e-08	6.58375e-08	NA	0	0	0.181449	7.5882e-08	0
Acidaminococcus intestini	0.833935	2.34478e-05	1.5709e-05	1	1.91552e-05	6.79726e-05	1	4.24673e-05	6.14364e-05
[Eubacterium] yurii	0.833935	7.72993e-08	1.8969e-08	0.855132	1.47609e-08	3.94638e-08	0.0590582	8.73078e-08	0
Streptococcus constellatus	0.833935	4.17763e-07	2.83204e-07	0.208413	2.29437e-07	7.639e-08	0.418492	1.14164e-07	1.29189e-07
[Clostridium] hiranonis	0.838464	1.43837e-07	1.78041e-07	0.578125	1.79784e-07	2.58703e-07	0.789268	7.81015e-08	1.39897e-07
Neisseria gonorrhoeae	0.838464	3.77416e-07	1.56482e-07	1	1.07874e-07	3.55174e-08	0.787406	1.94297e-07	1.431e-07
Parvimonas sp. oral taxon 110	0.838464	4.97315e-08	3.92719e-08	0.855132	2.12615e-07	8.35691e-08	0.589639	7.64875e-08	5.76922e-08
Haemophilus haemolyticus	0.846924	1.0447e-05	3.77756e-06	0.375	1.88347e-06	7.3053e-07	0.8125	8.60979e-06	1.03467e-05
Prevotella buccalis	0.846924	0.000237484	0.000209526	0.375	2.03952e-05	1.45309e-05	0.21875	6.03323e-06	9.15625e-06
Campylobacter jejuni	0.846924	1.33374e-05	1.40723e-05	0.296875	2.06018e-05	1.57064e-05	0.674987	2.13009e-06	2.43804e-06
Enterococcus faecalis	0.846924	2.58817e-05	2.77664e-05	0.6875	2.82506e-05	2.54246e-05	0.578125	4.41858e-05	9.40112e-05
Bacteroides fluxus	0.846924	0.000253028	0.000264721	0.15625	0.000358966	0.00043229	0.078125	0.000195881	0.000280987
Ruminococcus bromii	0.846924	0.00375683	0.00413397	1	0.00555187	0.00485481	0.015625	0.00534223	0.00386703
Bacteroides coprocola	0.846924	0.00664875	0.00604262	0.296875	0.00145775	0.00196467	1	0.00672665	0.00670802
Bifidobacterium animalis	0.846924	1.45576e-05	0.000341494	1	0.000761238	5.54475e-05	1	2.36803e-05	2.33032e-05
Akkermansia muciniphila	0.846924	0.00318255	0.00162456	0.578125	0.0209629	0.0135986	0.46875	0.0115133	0.0309401
Turicibacter sanguinis	0.846924	9.68536e-06	1.44136e-05	0.46875	1.30725e-06	2.41371e-06	0.375	2.92416e-06	1.44066e-05
unclassified Prevotella sp. oral taxon 299	0.855132	4.71286e-07	1.77894e-07	1	1.21747e-06	5.838e-07	NA	0	0
unclassified Streptococcus sp. oral taxon 056	0.855132	5.33174e-08	2.43228e-08	0.280713	1.23242e-07	6.64609e-08	0.371093	1.47713e-08	4.00897e-09
Streptococcus equi	0.855132	2.73348e-08	1.40442e-08	0.855132	5.16337e-08	4.97829e-08	0.371093	2.91766e-08	0
Citrobacter rodentium	0.855132	4.14558e-08	1.9719e-07	1	1.4796e-07	0	0.789268	5.08538e-07	6.9041e-07
Lactobacillus hilgardii/buchneri/brevis	0.855132	1.26028e-08	2.30605e-08	0.371093	3.76169e-08	0	0.371093	0	1.57367e-08
Clostridium ramosum	0.890381	7.84623e-05	4.36878e-05	0.6875	1.60013e-05	1.75895e-05	0.46875	0.000509569	4.7984e-05
Veillonella atypica	0.890381	1.49136e-05	3.78643e-06	0.296875	7.84233e-06	8.79894e-06	0.21875	4.0051e-05	2.62955e-05
unclassified Lachnospiraceae bacterium 3_1_57FAA CT1	0.890381	0.000463805	0.000427073	0.375	0.000317004	0.00020036	1	0.000124413	0.000136428
Bifidobacterium angulatum	0.890381	0.000127887	0.00012832	0.9375	8.01212e-05	0.000103984	0.015625	0.00516918	0.000860093
Eubacterium biforme	0.890381	0.000740666	0.000621284	0.375	0.000362646	0.000591614	0.15625	0.000165594	9.0976e-05
Coprococcus comes	0.890381	0.00189671	0.00144826	1	0.00127885	0.00172099	0.21875	0.000510106	0.00078983
Aggregatibacter segnis	0.900086	1.86695e-06	6.60483e-07	0.296875	2.44805e-06	2.78908e-07	0.8125	2.68489e-06	2.75673e-06
Enterococcus gallinarum	0.900086	2.65015e-06	2.30412e-06	0.583882	8.43598e-08	1.50299e-07	0.208413	2.88914e-06	5.30403e-07
Lactobacillus casei group	0.900086	7.60224e-07	6.75899e-06	0.142213	9.2414e-07	6.8588e-08	0.21875	1.93796e-06	7.90017e-07
Oenococcus oeni	0.900086	1.0234e-05	5.03569e-06	0.0591721	1.61137e-07	7.48585e-07	0.142213	1.44449e-05	2.53092e-06
unclassified Oribacterium sp. oral taxon 108	0.905695	9.48038e-07	7.91379e-07	0.833935	7.29784e-07	8.19379e-07	0.181449	7.64526e-08	9.35492e-07
Corynebacterium striatum	0.905695	2.06406e-08	2.1089e-08	0.181449	0	1.51772e-08	0.789268	8.09706e-09	3.83801e-09
Haemophilus parainfluenzae	0.934082	0.000333547	7.99737e-05	0.296875	4.80182e-05	1.79191e-05	0.9375	0.00022532	0.000353214
unclassified Streptococcus sp. C150	0.934082	7.27805e-06	6.26273e-06	0.375	7.19176e-06	4.85662e-06	0.375	8.6277e-06	2.051e-06
Collinsella aerofaciens	0.934082	0.00257958	0.00298433	0.46875	0.00160746	0.00145949	0.6875	0.00300795	0.00273938
Clostridium leptum	0.934082	0.000827785	0.000557333	1	0.00174845	0.0017435	0.9375	0.000145796	0.000133809
Lactobacillus fermentum	0.934082	7.48227e-07	1.29328e-06	0.375	7.74165e-06	6.11277e-07	0.296875	7.8801e-07	1.02346e-06
Subdoligranulum variabile	0.934082	0.000246226	0.00024956	0.8125	0.000206154	0.000196813	0.21875	0.000176562	0.000155278
Lactobacillus ruminis	0.934082	0.000157574	0.00017833	0.9375	0.00185438	0.000215037	0.015625	0.0368039	0.031382
Eubacterium siraeum	0.934082	0.000851026	0.00102216	0.296875	0.000711366	0.000681775	0.109375	0.001129	0.000561239
unclassified Clostridiales bacterium 1_7_47FAA	0.934082	7.77479e-05	7.60633e-05	0.8125	8.53183e-05	6.26255e-05	0.46875	0.000130129	5.3527e-05
Porphyromonas gingivalis	0.944183	1.23905e-06	1.9751e-06	0.280713	1.17731e-06	1.41375e-06	0.855132	1.90963e-07	4.61357e-08
Prevotella melaninogenica	0.964541	2.98984e-06	3.6224e-06	0.208413	4.38349e-06	2.95492e-06	0.418492	6.95338e-06	8.47637e-06
Oscillibacter valericigenes	0.964541	7.42315e-07	8.47525e-07	0.0590582	3.47186e-07	6.64116e-07	1	6.23069e-07	4.5545e-07
Veillonella parvula	0.977966	5.65195e-05	2.43698e-05	0.578125	3.43157e-05	3.84088e-05	0.578125	0.00013519	8.12757e-05
Peptoniphilus duerdenii	0.977966	1.25596e-06	1.69114e-06	0.9375	8.48831e-07	4.41249e-07	0.833935	1.56978e-06	1.66328e-06
unclassified Lachnospiraceae bacterium 4_1_37FAA	0.977966	8.14309e-05	2.44654e-05	0.8125	1.99091e-05	2.36093e-05	0.578125	1.25017e-05	2.51825e-05
Bacteroides thetaiotaomicron	0.977966	0.00661468	0.00442717	0.375	0.00744564	0.00846903	0.6875	0.00357624	0.00366605
unclassified Coprobacillus sp. 29_1	0.977966	0.000104547	0.00010214	0.9375	0.000174024	0.000182022	0.015625	6.93202e-05	4.82542e-05
Eubacterium limosum	0.977966	2.15423e-05	1.87654e-05	0.46875	2.81816e-05	1.93526e-05	0.46875	1.46487e-05	1.40109e-05
Peptoniphilus lacrimalis	0.977966	2.03064e-06	3.1566e-06	0.8125	6.19322e-06	2.33642e-06	0.142213	2.7499e-06	1.84716e-06
Bifidobacterium breve	0.977966	9.04041e-05	9.79467e-05	0.15625	0.000346831	0.000181035	0.046875	0.00112756	0.000823159
unclassified Streptococcus sp. oral taxon 071	0.977966	2.92768e-06	3.04383e-06	0.46875	4.74554e-06	2.51625e-06	0.8125	5.10165e-06	4.73781e-06
Haemophilus influenzae	1	1.31624e-05	3.605e-06	0.674987	1.35148e-06	4.77282e-07	0.8125	8.6159e-06	1.11641e-05
unclassified Capnocytophaga sp. oral taxon 329	1	0.00239509	0.00245832	0.6875	0.00205807	0.00174058	0.296875	0.00264927	0.00134019
Veillonella dispar	1	8.25582e-06	4.27025e-06	0.296875	7.5439e-06	6.65492e-06	0.46875	4.57308e-05	2.27196e-05
Edwardsiella ictaluri/tarda	1	5.39264e-09	5.80209e-09	0.100348	2.74072e-07	4.49486e-09	NA	0	0
Desulfovibrio alaskensis	1	1.21783e-07	1.21634e-07	0.422678	2.17359e-06	1.58404e-06	NA	0	0
Dehalogenimonas lykanthroporepellens	1	3.98295e-08	4.5095e-08	0.371093	5.33237e-07	4.84413e-07	NA	0	0
unclassified Geobacter sp. M18	1	4.92011e-08	1.44987e-08	0.371093	1.73127e-07	1.59587e-07	NA	0	0
Desulfovibrio aespoeensis	1	1.22603e-07	1.5136e-07	1	1.44078e-06	1.85204e-06	NA	0	0
Fusobacterium ulcerans	1	1.0941e-07	3.17999e-09	1	3.99816e-08	3.70508e-07	NA	0	0
Syntrophobacter fumaroxidans	1	2.21965e-07	2.53343e-07	1	2.20008e-06	1.5749e-06	NA	0	0
Dichelobacter nodosus	1	5.52327e-08	5.99756e-08	1	9.06421e-08	1.89233e-07	NA	0	0
Clostridium bolteae	1	0.000371379	0.000526009	0.6875	0.000581845	0.000454217	0.46875	0.000250319	7.32994e-05
Prevotella marshii	1	7.93683e-07	5.15395e-07	0.789268	3.56235e-06	3.66423e-06	1	4.05837e-07	4.47042e-07
Brachyspira pilosicoli	1	4.42443e-08	1.63069e-08	NA	0	0	1	9.09543e-08	1.87523e-08
Weissella paramesenteroides	1	0	4.95091e-09	NA	0	0	1	3.7708e-08	1.36178e-08
Yersinia enterocolitica	1	2.15809e-06	1.04858e-08	NA	0	0	1	6.7272e-08	4.42907e-08
Dickeya dadantii	1	5.53125e-08	0	0.371093	0	1.27319e-07	NA	0	0
Sodalis glossinidius	1	1.478e-08	1.63201e-09	0.371093	1.93671e-08	0	NA	0	0
Achromobacter piechaudii	1	4.30747e-09	2.6615e-09	1	4.41871e-07	3.84877e-09	NA	0	0
Butyrivibrio fibrisolvens	1	1.46678e-08	5.71767e-09	1	1.58269e-07	4.34039e-08	NA	0	0
Nitrococcus mobilis	1	1.06274e-07	7.20053e-07	1	2.90117e-06	3.743e-07	NA	0	0
unclassified Selenomonas sp. oral taxon 149	1	1.21265e-06	2.79729e-07	1	7.64796e-07	1.27825e-06	NA	0	0
unclassified Thauera sp. MZ1T	1	3.50074e-08	8.27407e-10	1	1.53407e-09	0	1	4.68571e-08	7.67306e-09
Achromobacter xylosoxidans	1	0	5.1639e-09	NA	0	0	1	0	1.00493e-08
Acinetobacter johnsonii	1	2.59621e-09	0	NA	0	0	1	6.04319e-08	0
Clostridium cellulovorans	1	0	3.53103e-09	NA	0	0	1	0	6.22773e-09
Prevotella oralis	1	4.49246e-09	0	NA	0	0	1	8.04117e-09	0
Salmonella bongori	1	0	4.10427e-09	NA	0	0	1	0	1.21313e-09
Selenomonas noxia	1	0	2.85496e-09	NA	0	0	1	1.32992e-08	0
Thioalkalivibrio sulfidophilus	1	0	2.70494e-09	NA	0	0	1	2.61863e-07	0
Vibrio alginolyticus	1	2.73143e-09	0	NA	0	0	1	0	1.06113e-08
Brucella melitensis	1	3.48847e-09	0	1	0	1.73551e-08	NA	0	0
Fusobacterium varium	1	9.8921e-07	0	1	0	7.60391e-08	NA	0	0
Leuconostoc fallax	1	5.35131e-09	0	1	2.7543e-08	0	NA	0	0
Methylobacillus flagellatus	1	1.72511e-09	0	1	9.60711e-08	0	NA	0	0
unclassified unclassified Fusobacterium	1	1.36441e-08	1.03768e-08	0.371093	1.65564e-08	0	0.181449	4.32294e-08	5.362e-09
Atopobium vaginae	1	8.83881e-06	8.51609e-06	1	4.2528e-06	5.18473e-06	0.6875	1.74304e-05	1.51955e-05
unclassified Prevotella sp. oral taxon 317	1	0	6.00374e-09	1	1.81497e-08	7.94217e-09	0.789268	2.25257e-08	1.52965e-08
Vibrio furnissii	1	3.22606e-09	3.88329e-09	1	3.00033e-08	2.29407e-08	1	9.46998e-07	2.73527e-08
Eikenella corrodens	1	2.13997e-09	1.95101e-09	1	2.28874e-08	1.9752e-08	1	0	1.07513e-08
Serratia plymuthica/odorifera	1	5.79125e-09	0	1	4.44839e-09	0	1	1.44464e-08	4.6329e-09
Lactobacillus iners	1	8.04653e-07	5.93166e-08	0.181449	5.98341e-08	0	1	7.59568e-08	6.13988e-08
Neisseria lactamica	1	1.24777e-08	4.10797e-09	1	1.2304e-08	0	0.371093	1.29709e-08	0
Pseudoramibacter alactolyticus	1	3.18795e-09	3.68395e-09	1	1.1441e-08	0	0.371093	1.47229e-08	0
Propionibacterium acnes	1	1.5713e-07	7.03729e-08	1	1.94305e-06	9.60977e-07	0.371093	1.45205e-07	1.86223e-07
unclassified Streptococcus sp. M143	1	9.29116e-08	1.19191e-07	0.418492	2.33154e-07	8.87561e-08	0.787406	1.73914e-07	9.03753e-08
Enterobacter cancerogenus	1	5.86273e-08	7.469e-09	0.36131	1.16091e-07	2.64988e-08	1	4.66664e-07	4.06911e-08
Comamonas testosteroni	1	8.72227e-09	0	1	5.8539e-08	3.13494e-08	0.371093	1.6021e-08	1.6687e-09
Streptococcus downei	1	2.94451e-09	0	0.181449	2.21619e-08	8.02033e-09	1	1.52787e-07	1.53604e-08
Pseudomonas stutzeri	1	6.59045e-08	2.15974e-08	1	3.05956e-06	1.0094e-07	0.583882	4.46665e-08	5.70532e-07
Pyramidobacter piscolens	1	1.37162e-07	9.86371e-07	0.36131	1.43147e-07	3.56446e-08	0.583882	1.40667e-06	1.20422e-06
Prevotella bergensis	1	2.24151e-06	6.64664e-06	0.21875	8.57968e-06	4.96159e-06	1	4.37905e-06	6.79306e-06
Fusobacterium periodonticum	1	0	4.29903e-09	1	9.09416e-09	1.03891e-08	1	2.72397e-07	3.05623e-08
Histophilus somni	1	4.75313e-09	7.5366e-09	0.422678	3.8092e-08	1.25249e-07	0.422678	5.62322e-07	7.48559e-07
Bifidobacterium catenulatum-Bifidobacterium pseudocatenulatum complex	1	0.00406205	0.0037542	0.6875	0.0039967	0.00494998	0.046875	0.0124712	0.00471323
Acinetobacter haemolyticus	1	0	1.30924e-09	1	6.57329e-08	0	1	8.98581e-09	0
Anaerococcus tetradius	1	0	6.49171e-09	1	0	1.21173e-08	1	3.89997e-09	0
Campylobacter rectus	1	8.01433e-10	6.38756e-10	1	1.7143e-09	0	1	0	1.63077e-09
Shewanella frigidimarina	1	2.68566e-09	0	1	0	1.76021e-09	1	0	9.13621e-09
Aeromonas caviae	1	0	3.38848e-09	NA	0	0	NA	0	0
Capnocytophaga canimorsus	1	7.49057e-08	4.20459e-08	NA	0	0	NA	0	0
Clostridium cellulolyticum	1	1.15015e-08	5.62105e-09	NA	0	0	NA	0	0
Erwinia amylovora	1	0	2.42875e-08	NA	0	0	NA	0	0
Helicobacter pylori	1	2.25062e-08	0	NA	0	0	NA	0	0
Lactobacillus buchneri	1	5.44943e-09	7.8068e-09	NA	0	0	NA	0	0
Lactobacillus jensenii	1	3.89928e-09	0	NA	0	0	NA	0	0
Leuconostoc gelidum	1	0	3.91404e-09	NA	0	0	NA	0	0
Simonsiella muelleri	1	1.03689e-08	3.05551e-09	NA	0	0	NA	0	0
Syntrophomonas wolfei	1	9.92493e-10	0	NA	0	0	NA	0	0
unclassified Verrucomicrobiae bacterium DG1235	1	1.24961e-07	1.28957e-07	NA	0	0	NA	0	0
unclassified gamma proteobacterium HdN1	1	1.5358e-07	2.04328e-07	NA	0	0	NA	0	0
Plautia stali symbiont	NA	0	0	NA	0	0	1	1.63307e-08	1.31887e-08
Rahnella aquatilis	NA	0	0	NA	0	0	1	5.35436e-08	9.51718e-08
Chlamydia trachomatis	NA	0	0	1	1.71214e-07	7.42599e-08	NA	0	0
Desulfarculus baarsii	NA	0	0	1	1.65163e-06	1.63199e-06	NA	0	0
Desulfuromonas acetoxidans	NA	0	0	1	7.95924e-07	6.92351e-07	NA	0	0
Lactobacillus amylolyticus	NA	0	0	1	5.8904e-08	1.21516e-08	NA	0	0
Pasteurella multocida	NA	0	0	1	6.03433e-08	3.68267e-08	NA	0	0
Syntrophus aciditrophicus	NA	0	0	1	1.51746e-07	2.35426e-07	NA	0	0
unclassified Candidatus Arthromitus sp. SFB-rat-Yit	NA	0	0	1	1.37346e-08	1.19731e-08	NA	0	0
Acinetobacter junii	NA	0	0	NA	0	0	1	0	8.45283e-09
Cronobacter sakazakii/turicensis	NA	0	0	NA	0	0	1	1.87804e-08	0
Delftia acidovorans	NA	0	0	NA	0	0	1	1.74037e-08	0
Erwinia billingiae	NA	0	0	NA	0	0	1	1.30528e-08	0
Erwinia tasmaniensis	NA	0	0	NA	0	0	1	4.69509e-08	0
Lactobacillus kefiranofaciens	NA	0	0	NA	0	0	1	3.97533e-08	0
Nitrosomonas europaea	NA	0	0	NA	0	0	1	0	6.2359e-09
unclassified Rahnella sp. Y9602	NA	0	0	NA	0	0	1	3.68243e-08	0
Clostridium thermocellum	NA	0	0	1	0	3.88339e-08	NA	0	0
Eremococcus coleocola	NA	0	0	1	0	4.79873e-09	NA	0	0
Listeria innocua	NA	0	0	1	0	1.10288e-08	NA	0	0
Vibrio harveyi	NA	0	0	1	1.00297e-08	0	NA	0	0
Erysipelothrix rhusiopathiae	NA	0	0	1	0	4.0881e-08	1	1.02754e-07	1.58887e-07
Catonella morbi	NA	0	0	0.371093	1.44885e-08	0	1	8.61871e-09	2.01686e-08
Lactobacillus sanfranciscensis	NA	0	0	1	1.20921e-08	0	1	1.95534e-08	0
Serratia proteamaculans	NA	0	0	1	3.73091e-09	0	1	6.49321e-08	0
Streptococcus uberis	NA	0	0	1	0	2.15526e-09	1	3.14711e-08	0
unclassified Enterobacter sp. 638	NA	0	0	1	2.22485e-08	0	1	1.36652e-07	0

## Sheet: Table S6
Table S6: Genues and species that are significantly different in aboundance between CD and EF group
Genus	p-value (CD vs EF)	Mean CD	Mean EF	Enriched
Neisseria	0.000794384	1.03799e-06	3.49673e-06	EF
Haemophilus	0.00143302	7.22531e-05	0.000521681	EF
Capnocytophaga	0.00296311	0.00202701	0.00211514	EF
Streptobacillus	0.00339187	5.57028e-07	0	CD
Aggregatibacter	0.00576106	2.2003e-06	5.32444e-06	EF
Phascolarctobacterium	0.00786587	0.000151153	2.34883e-05	CD
Acetobacterium	0.00790124	3.92435e-07	0	CD
Oxalobacter	0.00820686	9.51213e-06	4.42642e-06	CD
Bulleidia	0.00852557	1.49815e-06	4.16394e-08	CD
Dorea	0.012248	0.0048547	0.00223122	CD
Campylobacter	0.012248	5.13327e-05	1.21824e-05	CD
Actinobacillus	0.0125747	4.54755e-08	5.61403e-07	EF
Bilophila	0.0158399	0.00518115	0.00130942	CD
Methanosphaera	0.0176246	1.38767e-05	0	CD
Ruegeria	0.0176246	4.03863e-08	0	CD
Desulfovibrio	0.0211869	0.000778551	0.0002117	CD
Staphylococcus	0.0241244	1.80863e-06	2.10135e-05	EF
Holdemania	0.0241244	0.000663397	0.000378549	CD
Cryptobacterium	0.0254445	1.09734e-06	3.14887e-06	EF
Dialister	0.0273955	0.00165285	0.000179988	CD
Desulfitobacterium	0.0311763	3.74547e-07	1.91045e-07	CD
Taylorella	0.0379188	4.14712e-07	0	CD
Actinoplanes	0.0379188	0	8.29326e-08	EF
Syntrophobacter	0.0379188	9.92144e-07	0	CD
Micrococcus	0.0379188	0	2.04628e-08	EF
Caldanaerobacter	0.0379188	3.41362e-07	0	CD
Dehalogenimonas	0.0379188	5.55316e-07	0	CD
Ralstonia	0.0379188	6.10999e-07	0	CD
Atopobium	0.0394817	1.01235e-05	2.96205e-05	EF
Porphyromonas	0.0394817	2.30147e-05	2.3739e-05	EF
Eggerthella	0.0394817	0.000886158	0.000246882	CD
Veillonella	0.0443691	8.71092e-05	0.000314546	EF
Species	p-value (CD vs EF)	Mean CD	Mean EF	Enriched
Clostridium kluyveri	1.23965e-05	1.60364e-06	1.62804e-08	CD
Dorea longicatena	7.8222e-05	0.00337238	0.000712141	CD
Desulfovibrio piger	0.000214909	0.000517804	4.68887e-07	CD
Haemophilus haemolyticus	0.000794384	1.307e-06	9.47826e-06	EF
Haemophilus influenzae	0.000863288	9.14381e-07	9.88998e-06	EF
Bacteroides finegoldii	0.000971368	0.00152107	0.000392183	CD
Haemophilus parainfluenzae	0.000971368	3.29686e-05	0.000289267	EF
Bacteroides stercoris	0.00143302	0.0175555	0.00207665	CD
Neisseria mucosa	0.00292944	1.02864e-07	6.33964e-07	EF
Thermoanaerobacter pseudethanolicus	0.00449106	4.59635e-07	1.10005e-08	CD
unclassified Capnocytophaga sp. oral taxon 329	0.00490555	0.00189932	0.00199473	EF
Blautia hydrogenotrophica	0.00576106	0.000238685	0.000275481	EF
Prevotella buccalis	0.00576106	1.74631e-05	7.59474e-06	CD
Phascolarctobacterium succinatutens	0.00786587	9.13841e-05	1.21738e-05	CD
Campylobacter concisus	0.00951344	4.68241e-07	1.37075e-06	EF
Enterococcus faecium	0.0106002	0.000145356	3.57793e-05	CD
Prevotella oris	0.0106002	4.27594e-05	1.44481e-05	CD
Lactobacillus amylovorus	0.0122271	3.8197e-06	9.9334e-07	CD
Veillonella dispar	0.012248	7.09941e-06	3.42252e-05	EF
Anaerostipes caccae	0.0141079	3.94724e-05	1.50398e-05	CD
Aggregatibacter segnis	0.0157969	1.36348e-06	2.72081e-06	EF
Bilophila wadsworthia	0.0158399	0.00496039	0.00125199	CD
unclassified Erysipelotrichaceae bacterium 5_2_54FAA	0.0162031	0.000146551	7.78595e-05	CD
Methanosphaera stadtmanae	0.0176246	1.38681e-05	0	CD
Edwardsiella ictaluri/tarda	0.0176246	1.39283e-07	0	CD
Desulfovibrio alaskensis	0.0176246	1.87882e-06	0	CD
Dialister invisus	0.018554	0.00132728	2.5158e-05	CD
Streptococcus peroris	0.0204855	1.17901e-07	1.6146e-07	EF
Mobiluncus curtisii	0.0211869	8.45712e-06	3.88499e-06	CD
Clostridium ramosum	0.0211869	1.67954e-05	0.000278777	EF
Finegoldia magna	0.0222904	5.25018e-07	1.68501e-07	CD
Prevotella tannerae	0.0229226	1.55109e-05	9.23687e-06	CD
Veillonella parvula	0.0241244	3.63623e-05	0.000108233	EF
Blautia hansenii	0.0273955	0.000199679	7.53472e-05	CD
Acinetobacter baumannii	0.0285236	4.26172e-07	5.82368e-08	CD
Peptoniphilus duerdenii	0.0288517	6.4504e-07	1.61653e-06	EF
unclassified Oribacterium sp. oral taxon 108	0.0352228	7.74582e-07	5.05972e-07	CD
Parascardovia denticolens	0.0379188	5.49763e-08	0	CD
Micrococcus luteus	0.0379188	0	2.04628e-08	EF
unclassified Prevotella sp. oral taxon 299	0.0379188	9.00634e-07	0	CD
Dehalogenimonas lykanthroporepellens	0.0379188	5.08825e-07	0	CD
unclassified Geobacter sp. M18	0.0379188	1.66357e-07	0	CD
Desulfovibrio aespoeensis	0.0379188	1.64641e-06	0	CD
Fusobacterium ulcerans	0.0379188	2.05245e-07	0	CD
Syntrophobacter fumaroxidans	0.0379188	1.88749e-06	0	CD
[Ruminococcus] torques	0.0394817	0.00257613	0.00131943	CD
Enterococcus gallinarum	0.0395931	1.17329e-07	1.70977e-06	EF
Veillonella atypica	0.0443691	8.32063e-06	3.31732e-05	EF
unclassified Streptococcus sp. oral taxon 056	0.0473395	9.48513e-08	9.39015e-09	CD
Porphyromonas gingivalis	0.049499	1.29553e-06	1.18549e-07	CD
Aggregatibacter actinomycetemcomitans	0.0496155	2.27333e-08	7.81073e-08	EF
Bacteroides uniformis	0.0497355	0.0816768	0.023929	CD
Clostridium symbiosum	0.0497355	0.000342226	0.000351965	EF
unclassified Lachnospiraceae bacterium 1_4_56FAA	0.0497355	7.76928e-05	2.37846e-05	CD
unclassified Lachnospiraceae bacterium 3_1_57FAA CT1	0.0497355	0.000258682	0.00013042	CD
Highlighted in blue: enriched in long-term vegetarians

## Sheet: Table S7
Table S7: Reporter scores for modules analyses
ID	Module	Reporter score (A vs. B )	Reporter score (CD vs. EF)
M00095	C5 isoprenoid biosynthesis, mevalonate pathway	-1.02326	-1.98729
M00348	Glutathione transport system	2.4631	-1.51118
M00178	Ribosome, bacteria	5.75181	-6.2655
M00055	N-glycan precursor biosynthesis	-2.17138	-1.08158
M00082	Fatty acid biosynthesis, initiation	-2.08629	-1.0535
M00045	Histidine degradation, histidine => N-formiminoglutamate => glutamate	0.939652	2.42859
M00334	Type VI secretion system	3.66349	2.1057
M00117	Ubiquinone biosynthesis, prokaryotes, chorismate => ubiquinone	3.71513	1.97831
M00236	Polar amino acid transport system	-0.754236	-2.28854
M00226	Histidine transport system	2.74474	2.24395
M00159	V-type ATPase, prokaryotes	2.46596	4.95757
M00326	RTX toxin transport system	0.127313	2.64639
M00186	Putative tungstate transport system	-1.61301	1.96874
M00127	Thiamine biosynthesis, AIR => thiamine-P/thiamine-2P	-2.73675	0.54259
M00191	Thiamine transport system	2.09853	1.09758
M00215	D-Xylose transport system	1.05125	2.23503
M00087	beta-Oxidation	2.5607	1.71804
M00310	Pyruvate:ferredoxin oxidoreductase	-2.05411	-2.83341
M00300	Putrescine transport system	2.57694	2.32801
M00244	Zinc/manganese transport system	1.0517	-2.28618
M00049	Adenine nucleotide biosynthesis, IMP => ADP/dADP,ATP/dATP	-0.0954573	-2.37185
M00233	Glutamate transport system	0.594905	-3.2026
M00176	Sulfur reduction, sulfate => H2S	-3.28898	0.753964
M00164	ATP synthase	-4.5227	-3.44998
M00136	GABA biosynthesis, prokaryotes, putrescine => GABA	2.36474	0.596115
M00155	Complex IV (Cytochrome c oxidase), cytochrome o ubiquinol oxidase/cytochrome c oxidase/quinol oxidase polypeptide	3.24183	0.644075
M00053	Pyrimidine deoxyribonuleotide biosynthesis, CDP/CTP => dCDP/dCTP,dTDP/dTTP	0.184845	-2.84292
M00225	Lysine/arginine/ornithine transport system	2.46627	1.80826
M00010	Citrate cycle, first carbon oxidation	-2.54731	-0.138398
M00221	Simple sugar transport system	0.539148	-2.31117
M00349	Microcin C transport system	2.57054	1.47273
M00123	Biotin biosynthesis, pimeloyl-CoA => biotin	-1.9913	1.49038
M00133	Polyamine biosynthesis, arginine => agmatine => putrescine => spermidine	1.09391	2.3527
M00335	Sec (secretion) system	2.2235	-1.89233
M00207	Multiple sugar transport system	-0.407787	-3.00813
M00313	indolepyruvate:ferredoxin oxidoreductase	-0.945643	3.93819
M00230	Glutamate/aspartate transport system	1.72427	-2.65227
M00222	Phosphate transport system	-3.08608	-2.52847
M00238	D-Methionine transport system	0.382781	-2.49537
M00376	3-Hydroxypropionate bicycle	0.469522	2.00057
M00241	Vitamin B12 transport system	2.81338	1.56398
M00328	Hemophore/metalloprotease transport system	2.04138	1.13834
M00190	Iron(III) transport system	1.68704	-2.07747
M00240	Iron complex transport system	1.44731	3.49959
M00360	Aminoacyl-tRNA biosynthesis, prokaryotes	0.562125	-2.06474
M00249	Capsular polysaccharide transport system	1.72109	4.35602
M00036	Leucine degradation, leucine => acetoacetate + acetyl-CoA	-0.195539	2.54256
M00174	Methane oxidation, methylotroph, methane => CO2	2.15213	0.331171
M00100	Sphingosine degradation	2.2692	-1.3175
M00185	Sulfate transport system	-2.89791	-1.48331
M00315	Putative ABC transport system	-0.511181	3.1814
M00063	CMP-KDO biosynthesis	0.657644	2.36241
M00193	Putative spermidine/putrescine transport system	2.17391	-0.32825
M00217	D-Allose transport system	1.81016	2.11568
M00319	Manganese/zinc/iron transport system	-0.596749	2.02079
M00368	Ethylene biosynthesis, methionine => ethylene	-2.39973	-0.757523
M00129	Ascorbate biosynthesis, animals, glucose-1P => ascorbate	-2.1914	1.36666
M00179	Ribosome, archaea	0.685637	-5.80365
M00206	Cellobiose transport system	-0.685968	-2.00368
M00278	PTS system, sorbose-specific II component	2.60109	3.17589
M00030	Lysine biosynthesis, 2-oxoglutarate => 2-aminoadipate => lysine	-0.0371001	3.32515
M00302	2-Aminoethylphosphonate transport system	2.18656	0.298171
M00150	Complex II (succinate dehydrogenase / fumarate reductase), fumarate reductase	2.43749	-0.294923
M00144	Complex I (NADH dehydrogenase), NADH dehydrogenase I	0.892749	3.31463
M00229	Arginine transport system	3.0577	1.01852
M00285	MCM complex	-0.328742	-2.26321
M00274	PTS system, mannitol-specific II component	1.0855	2.59878
M00324	Dipeptide transport system	4.20647	0.408135
M00023	Tryptophan biosynthesis, chorismate => tryptophan	-4.00737	-0.0708909
M00331	Type II general secretion system	6.43382	3.9834
M00019	Leucine biosynthesis, pyruvate => 2-oxoisovalerate => leucine	-1.97041	-2.53441
M00081	Pectin degradation	-2.0675	0.404625
M00242	Zinc transport system	-0.591267	2.14863
M00277	PTS system, N-acetylgalactosamine-specific II component	-3.08309	0.754597
M00224	Putative phosphonate transport system	0.307688	4.1797
M00015	Proline biosynthesis, glutamate => proline	-2.07162	-0.388747
M00232	General L-amino acid transport system	1.62189	-2.31473
M00029	Urea cycle	0.203442	-2.00029
M00096	C5 isoprenoid biosynthesis, non-mevalonate pathway	-2.13798	-0.317563
M00050	Guanine nucleotide biosynthesis, IMP => GDP/dGDP,GTP/dGTP	0.310536	-2.43713
M00258	Uncharacterized ABC transport system	-2.40858	-0.268773
M00365	C10-C20 isoprenoid biosynthesis, archaea	0.986701	-2.02999
M00354	Spliceosome, U4/U6.U5 tri-snRNP	0.454021	-2.2137
M00183	RNA polymerase, bacteria	0.833454	-2.80728
M00239	Peptides/nickel transport system	0.250143	-3.68026
M00032	Lysine degradation, lysine => saccharopine => acetoacetyl-CoA	2.4316	3.42436
M00311	2-oxoglutarate:ferredoxin oxidoreductase	-0.454515	3.64028
M00192	Putative thiamine transport system	2.52044	2.43813
M00209	Osmoprotectant transport system	4.92676	3.95365
M00002	Glycolysis, core module involving three-carbon compounds	-0.390282	-2.2926
M00122	Cobalamin biosynthesis, cobinamide => cobalamin	-2.48783	3.44269
M00228	Putative glutamine transport system	0.225817	-2.68575
M00157	F-type ATPase, bacteria	-4.5227	-3.44998
M00014	Glucuronate pathway (uronate pathway)	-2.30888	-0.414228
M00332	Type III secretion system	4.53355	8.85124
M00213	L-Arabinose transport system	2.62846	0.820291

## Sheet: Table S8
Table S8: Average sequencing reads obtained from individual samples from each subgroup.a
	A	B	C	D	E	F	Total
BCR
Number of reads	613643 ± 430439	2297420 ± 3124228	2033139 ± 1299482	1410088 ± 516469	3584039 ± 4984399	2175450 ± 2360262	1853396 ± 2327686
Total CDR3s	610070 ± 426217	2278737 ± 3095437	2023059 ± 1288842	1403320 ± 514218	3549805 ± 4936768	2158013 ± 2347390	1840168 ± 2306583
Unique CDR3s	31306 ± 19889	45493 ± 49970	76939 ± 90149	67997 ± 106063	136943 ± 144738	193425 ± 308269	77642 ± 125011
TCR
Number of reads	4908728 ± 3360147	6328103 ± 4808782	4547503 ± 2264179	5814735 ± 3792848	4898106 ± 4452405	4853308 ± 4698764	5300946 ± 3678382
Total CDR3s	4851222 ± 3320270	6231668 ± 4688448	4479379 ± 2235384	5740063 ± 3755760	4832762 ± 4382153	4791614 ± 4634413	5228861 ± 3616923
Unique CDR3s	236274 ± 116449	267875 ± 77847	347258 ± 155090	281345 ± 136398	249846 ± 164188	274460 ± 217789	277122 ± 134371
a. Numbers are based on unique CDR3-V-J combinations or on total CDR3s

## Sheet: Table S9
Table S9: Statistics for different immune indexes.
	A vs B	C vs D	E vs F	A vs C	B vs D	A vs E	B vs F	C vs E	D vs F	CD vs EF	ACD vs B vs EF	ACD vs EF	AC vs E
IgD	0.0390625	1	0.25	0.396892	0.463403	0.367677	0.569697	0.648485	0.648485	0.867555	0.737615	0.534229	0.809598
IgM	0.640625	0.15625	0.625	0.120591	0.396892	0.933333	0.460606	0.0727273	0.109091	0.0196516	0.195981	0.0704311	0.410733
IgG	0.546875	0.296875	0.375	0.0938617	0.0721057	0.569697	0.569697	0.0121212	0.0727273	0.00161366	0.0204097	0.00992803	0.100103
IgA	0.382812	0.46875	0.875	0.0400932	0.463403	0.367677	0.933333	0.412121	0.315152	0.165313	0.759237	0.565081	0.9613
IgE	0.546875	0.9375	0.375	0.151981	0.013986	0.682828	0.933333	0.0424242	0.109091	0.00217031	0.0407401	0.0236583	0.184727
Unclassified	0.0546875	0.9375	0.875	0.955089	0.396892	0.808081	0.808081	0.648485	0.787879	0.569891	0.289087	0.62914	0.664603
VH1	0.945312	0.8125	0.125	0.0721057	0.0205128	0.460606	0.682828	0.787879	0.230303	0.297345	0.198717	0.565081	0.809598
VH2	0.3125	0.578125	0.25	0.955089	0.231857	0.214141	0.214141	0.163636	0.648485	0.23824	0.219987	0.201545	0.124355
VH3	0.0546875	1	0.875	0.151981	0.0021756	0.282828	0.0040404	0.527273	0.163636	0.266692	0.000701665	0.0630915	0.307018
VH4	0.546875	1	0.625	0.189277	0.0540793	0.933333	0.214141	0.787879	0.927273	1	0.2759	0.730335	0.9613
VH5	0.015625	0.46875	0.625	0.955089	0.151981	0.0282828	0.0161616	0.109091	0.0727273	0.00812459	0.000662966	0.00301832	0.0273478
VH6	0.0546875	0.578125	0.625	0.694328	0.463403	0.933333	0.153535	0.527273	0.527273	0.40202	0.199358	0.343533	0.664603
VH7	0.546875	1	0.375	0.013986	0.53582	0.0282828	0.282828	0.0727273	0.412121	0.042149	0.0475222	0.013449	0.0196078
V3-23	0.546875	0.296875	0.875	0.396892	0.189277	0.109091	0.0727273	0.412121	0.412121	0.145035	0.0277029	0.0395385	0.152219
V3-64	0.015625	0.578125	0.875	0.280963	0.189277	0.569697	0.0484848	1	0.927273	0.973381	0.0852918	0.596741	0.736326
V4_34	0.195312	0.8125	0.625	0.694328	0.955089	0.808081	1	0.927273	0.927273	0.815405	0.964973	0.800523	0.809598
V5-51	0.0390625	0.46875	0.625	0.955089	0.396892	0.0484848	0.0484848	0.109091	0.0727273	0.0102511	0.0034804	0.00516186	0.0366357
V3-66	0.078125	0.9375	0.625	0.463403	0.0289044	0.569697	0.0040404	0.527273	0.163636	0.266692	0.00643054	0.129382	0.46904
V3-74	0.0234375	0.21875	0.375	0.280963	0.120591	0.808081	0.153535	0.787879	0.412121	0.40202	0.0231346	0.320208	0.736326
V3-9	0.460938	0.9375	0.25	0.120591	0.612587	0.282828	0.0727273	0.0424242	0.163636	0.00495356	0.0223233	0.00848055	0.0799794
V3d	0.640625	0.6875	1	0.0400932	0.396892	0.933333	1	0.163636	0.109091	0.0196516	0.2433	0.0965121	0.530444
V5a	0.0234375	0.6875	0.875	0.866511	0.280963	0.0282828	0.0484848	0.0727273	0.0242424	0.00217031	0.00150261	0.00111466	0.0196078
V3-15	0.0390625	1	0.625	0.396892	0.0400932	0.153535	0.0727273	0.315152	1	0.664234	0.0136467	0.419547	0.152219
V3-33	0.015625	0.46875	0.25	0.335664	0.120591	0.282828	0.109091	0.230303	0.109091	0.0291772	0.00865448	0.0236583	0.184727
V3-53	0.382812	0.9375	0.875	0.0721057	0.0938617	0.282828	0.109091	1	0.787879	0.920336	0.0733857	0.419547	0.530444
V4-39	0.640625	0.9375	0.625	0.335664	0.189277	0.0161616	0.0484848	0.109091	0.230303	0.0291772	0.00832755	0.00362725	0.0196078
TRBV18	0.742188	1	0.125	0.955089	0.778866	0.153535	0.214141	0.163636	0.412121	0.0698252	0.0705778	0.0395385	0.100103
TRBV3-1	0.382812	0.078125	0.25	0.00590521	0.0289044	0.682828	0.282828	0.0424242	0.0727273	0.00289583	0.0305383	0.0206444	0.184727
TRBV30	0.742188	0.8125	0.375	0.463403	0.955089	0.282828	0.214141	0.315152	0.163636	0.0501611	0.114157	0.0395385	0.220846
TRBV9	0.84375	0.21875	0.875	0.396892	0.955089	0.214141	0.214141	0.0727273	0.230303	0.0196516	0.0665661	0.0206444	0.0799794
TRBV5-8	0.078125	0.46875	0.375	0.955089	0.463403	0.0727273	0.282828	0.109091	0.0727273	0.0159427	0.0168445	0.00362725	0.0485036
TRBV6-9	0.546875	0.109375	1	0.955089	0.231857	0.367677	0.0484848	0.0424242	0.163636	0.0291772	0.0206905	0.0349295	0.100103
TRBV16	0.3125	0.9375	0.375	0.0721057	0.396892	0.214141	0.682828	0.648485	0.230303	0.187597	0.922941	0.765192	0.664603
TRBV29	0.640625	0.578125	0.375	0.612587	0.189277	0.569697	0.153535	0.412121	0.412121	0.211852	0.181755	0.155501	0.410733
TRBV6-1	0.640625	0.078125	0.625	0.612587	0.00932401	0.214141	0.0484848	0.527273	0.787879	0.569891	0.0367034	0.23707	0.262126
TRBV6-3	0.84375	0.296875	0.875	0.612587	0.866511	0.808081	0.569697	0.315152	0.527273	0.211852	0.537359	0.276604	0.46904
TRBV7-3	0.640625	0.078125	0.25	0.778866	0.866511	0.460606	0.0727273	0.230303	0.230303	0.0816962	0.115722	0.0704311	0.262126
TRBV7-7	0.640625	0.9375	0.875	0.151981	0.280963	0.682828	0.933333	0.412121	0.315152	0.165313	0.406783	0.23707	0.46904
TRBV7-4	0.0390625	0.078125	0.375	0.778866	0.0540793	0.0161616	0.808081	0.0242424	0.230303	0.00812459	0.0130481	0.00516186	0.00619195
TRBV6-6	0.382812	0.109375	0.625	0.53582	0.151981	0.933333	0.109091	0.163636	0.648485	0.145035	0.122968	0.23707	0.410733
TCR (D50)	0.640625	0.127508	0.125	1	0.354109	0.147414	0.307332	0.106592	0.0882469	0.0201681	0.0603046	0.0214602	0.0794561
BCR (D50)	0.944114	0.8125	0.25	0.90687	0.907373	0.0603629	0.863711	0.057634	1	0.159862	0.320061	0.144015	0.0305162
We compared the different immune indexes between A and B, between C and D, between E and F using wilcoxon signed-rank test, between ACD and B and EF using kruskal wallis test,
and the other groups using wilcoxon rank-sum test. P valuens are shown in the table.
P values <0.05 are highloighted in red

## Sheet: Table S10
Table S10: Phenotypes that may be assoicated with the gut microbiota (highlited in red)
	Phenotype	p-value
Phteotype	6 Group (A vs B vs Cvs D vs E vs F)	0.9795
	2 Group (day 0 vs day 91)	1
	3 Group (ACD vs B vs EF)	0.1201
	Gender	0.0009
	Age	0.003
	BMI	0.0009
	Enterotype	0.0001
	Control1 (omnivorous) vs control2 (Vegetarians)	0.0189
Immune index	IgD	0.0453
	IgM	0.004
	IgG	0.0493
	IgA	0.0004
	IgE	0.0866
	Unclassified Ig	0.011
	VH1	0.008
	VH2	0.018
	VH3	0.1745
	VH4	0.0122
	VH5	0.5146
	VH6	0.0158
	VH7	0.0001
	V3-23	0.0202
	V3-64	0.0038
	V4-34	0.0303
	V5-51	0.0363
	V3-66	0.0182
	V3-74	0.1623
	V3-9	0.3732
	V3-d	0.2095
	V5-a	0.0415
	V3-15	0.159
	V3-33	0.1269
	V3-53	0.0245
	V4-39	0.0056
	TRBV18	0.0292
	TRBV3-1	0.0095
	TRBV30	0.219
	TRBV9	0.1544
	TRBV5-8	0.0105
	TRBV6-9	0.0432
	TRBV16	0.2159
	TRBV29	0.1566
	TRBV6-1	0.1231
	TRBV6-3	0.0004
	TRBV7-3	0.0526
	TRBV7-7	0.0023
	TRBV7-4	0.0043
	TRBV6-6	0.1476
	TCR (D50)	0.0006
	BCR (D50)	0.1254
	Highlted in red: p value less than 0.05 (Permanova analysis)
	Phenotype statstics were based on all subjects (n=29)
	Immunu index statisitcs were based on subjects with both metagnome and immune repertoires seuqenced

[truncated: 1 more sheets: Table S11]
